# Supplementary material for: Effect of Intrinsic Patterns of Functional Brain Connectivity in Moderating Antidepressant Treatment Response in Major Depression
Source: Atypon-hosted journal article supplement (doi:10.1176/appi.ajp.2019.18070870), 2019-09-20
Supplement: appi.ajp.2019.18070870.ds001.pdf [file appi.ajp.2019.18070870.ds001.pdf]

**FIGURE S1.** EMBARC CONSORT Flow Diagram. For this analysis patients were included (1) regardless of their HAMD<sub>17</sub> score, (2) had resting state fMRI data, and (3) had at least one follow up visit.

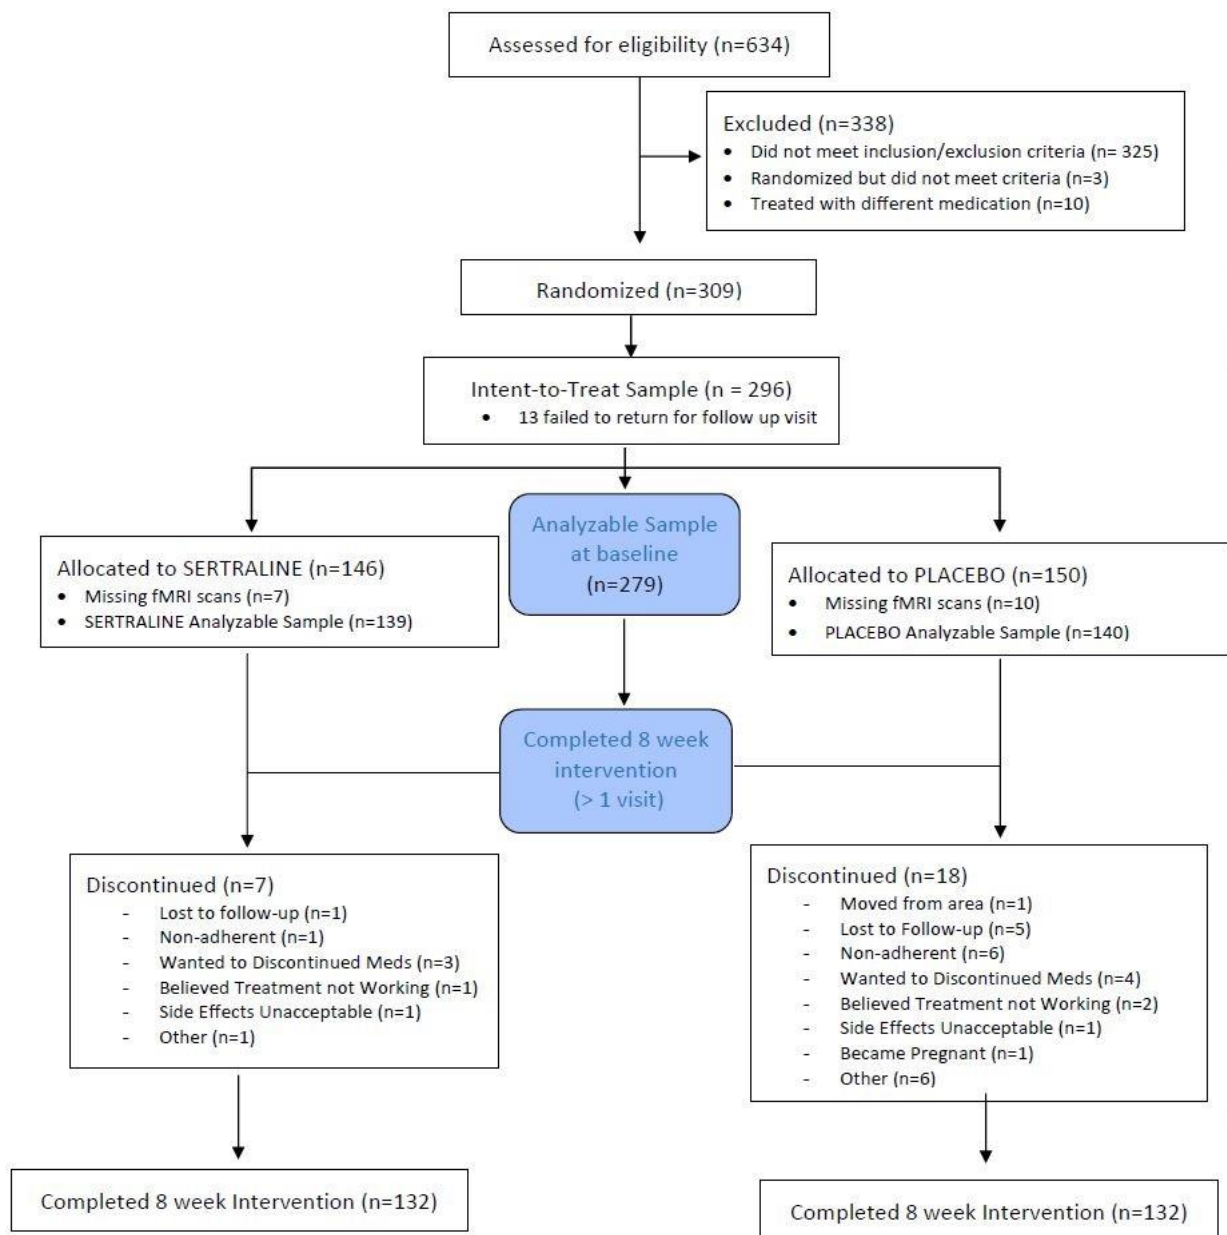

**FIGURE S2.** Nonspecific predictors. Lines extending from one network to the other represent between-network moderators. Loops extending from a network represents within-network moderators. The thickness of the line is computed based on the number of moderators between the networks of interest relative to the total number of possible moderators (i.e., thicker line implies more connections between the networks, compared to a thinner line).

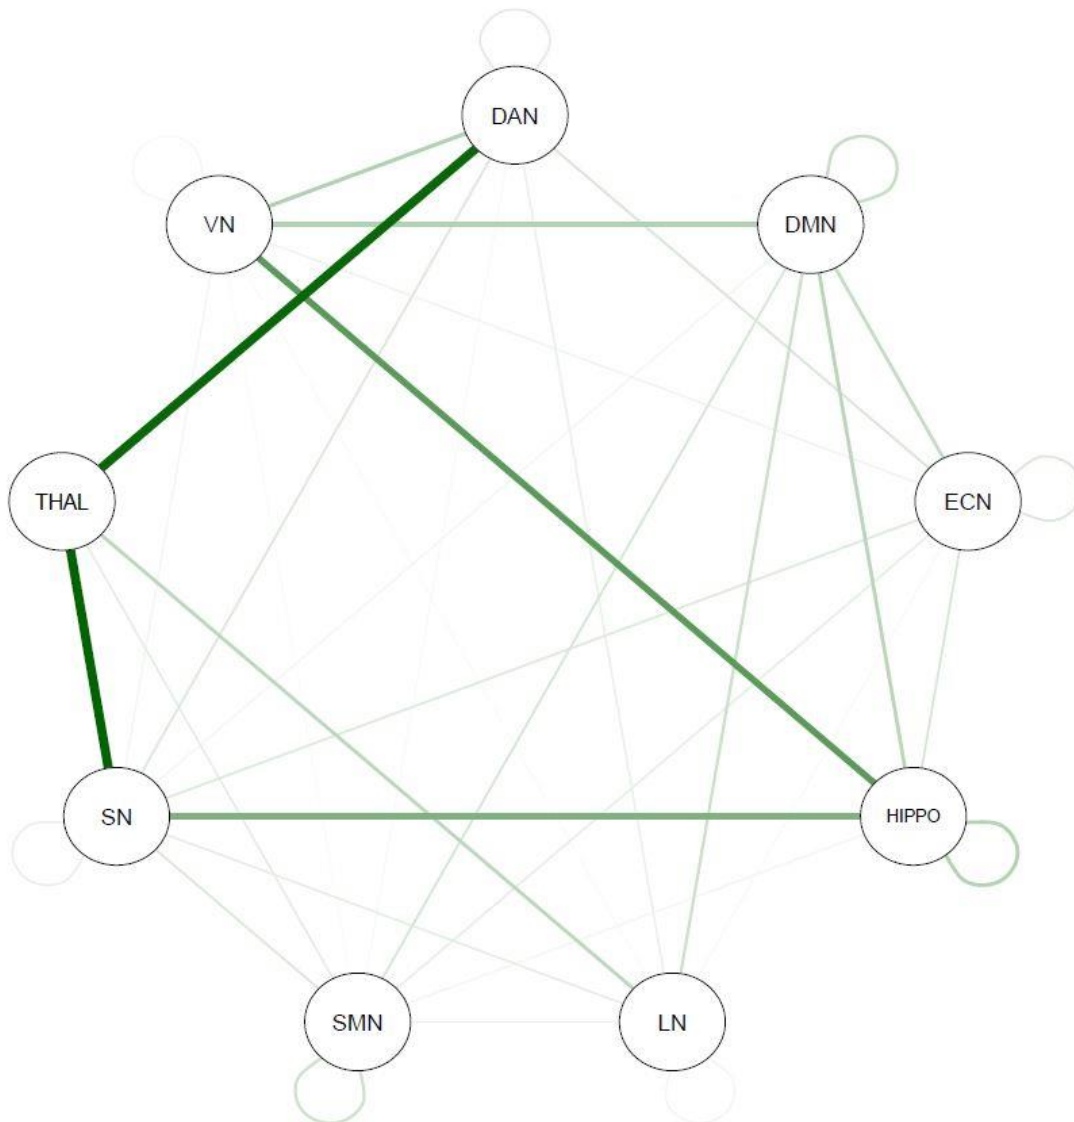

**TABLE S1.** Structural MRI and resting-state fMRI acquisition scanning parameters

|                   | <i>CU</i>                                                                                                                  | <i>MGH</i>                                                                                                                  | <i>TX</i>                                                                                                                  | <i>UM</i>                                                                                                                 |
|-------------------|----------------------------------------------------------------------------------------------------------------------------|-----------------------------------------------------------------------------------------------------------------------------|----------------------------------------------------------------------------------------------------------------------------|---------------------------------------------------------------------------------------------------------------------------|
| <i>Scanner</i>    | General Electric 3T                                                                                                        | Siemens 3T                                                                                                                  | Phillips 3T                                                                                                                | Phillips 3T                                                                                                               |
| <i>Structural</i> | Series = IR FSPGR<br>TR/TE=6.0ms/2.4ms<br>Flip Angle=9°<br>Thickness=1mm<br>Resolution=1×1mm <sup>2</sup><br>Duration=5min | Series = MPRAGE<br>TR/TE=2.3s/2.54ms<br>Flip Angle=9°<br>Thickness=1mm<br>Resolution=1×1mm <sup>2</sup><br>Duration=4.30min | Series = MPRAGE<br>TR/TE=8ms/3.7ms<br>Flip Angle=12°<br>Thickness=1mm<br>Resolution=1×1mm <sup>2</sup><br>Duration=4.24min | Series = TFE<br>TR/TE=8.1ms/3.7ms<br>Flip Angle=12°<br>Thickness=1mm<br>Resolution=1×1mm <sup>2</sup><br>Duration=5.29min |
| <i>rsfMRI</i>     | TR/TE=2000/28msec<br>Flip Angle = 90°<br>Res.=3.2x3.2mm <sup>2</sup><br>Thickness = 3.1mm<br>Matrix = 64×64                | TR/TE=2000/28msec<br>Flip Angle = 90°<br>Res.=3.2x3.2mm <sup>2</sup><br>Thickness = 3.1mm<br>Matrix = 64×64                 | TR/TE=2000/28msec<br>Flip Angle = 90°<br>Res.=3.2x3.2mm <sup>2</sup><br>Thickness = 3.1mm<br>Matrix = 64×64                | TR/TE=2000/28msec<br>Flip Angle = 90°<br>Res.=3.2x3.2mm <sup>2</sup><br>Thickness = 3.1mm<br>Matrix = 64×64               |

**TABLE S2.** Baseline sociodemographic and clinical variables for sertraline remitters and sertraline non remitters

|                              |                  | <u>Sertraline</u> |       | <u>Remitters</u> |       | <u>Non Remitters</u> |       |          |         |
|------------------------------|------------------|-------------------|-------|------------------|-------|----------------------|-------|----------|---------|
| <u>Categorical variables</u> |                  | n                 | %     | n                | %     | n                    | %     | $\chi^2$ | p value |
| Gender                       |                  |                   |       |                  |       |                      |       | 0.03     | 0.86    |
|                              | Male             | 41                | 29.50 | 14               | 28.57 | 27                   | 30.00 |          |         |
|                              | Female           | 98                | 70.50 | 35               | 71.43 | 63                   | 70.00 |          |         |
| Race                         |                  |                   |       |                  |       |                      |       | 1.27     | 0.53    |
|                              | White            | 86                | 61.87 | 31               | 63.26 | 55                   | 61.11 |          |         |
|                              | African American | 32                | 23.02 | 9                | 18.37 | 23                   | 25.56 |          |         |
|                              | Other            | 21                | 15.11 | 9                | 18.37 | 12                   | 13.33 |          |         |
| Employment status            |                  |                   |       |                  |       |                      |       | 6.64     | 0.04    |
|                              | Employed         | 76                | 54.68 | 34               | 69.39 | 42                   | 46.67 |          |         |
|                              | Unemployed       | 58                | 41.73 | 14               | 28.57 | 44                   | 48.89 |          |         |
|                              | Unknown          | 5                 | 3.60  | 1                | 2.04  | 4                    | 4.44  |          |         |
| Site                         |                  |                   |       |                  |       |                      |       | 16.00    | <.01    |
|                              | CU               | 39                | 28.06 | 23               | 46.94 | 16                   | 17.78 |          |         |
|                              | MG               | 23                | 16.55 | 3                | 6.12  | 20                   | 22.22 |          |         |
|                              | TX               | 48                | 34.53 | 13               | 26.53 | 35                   | 38.89 |          |         |
|                              | UM               | 29                | 20.86 | 10               | 20.41 | 19                   | 21.11 |          |         |
| <u>Continuous variables</u>  |                  | Mean              | SD    | Mean             | SD    | Mean                 | SD    | t value  | p value |
| Age                          |                  | 38.00             | 14.00 | 38.04            | 13.76 | 37.29                | 13.93 | -0.31    | 0.76    |
| Age of onset                 |                  | 16.15             | 6.07  | 15.33            | 5.74  | 16.60                | 6.23  | 1.21     | 0.23    |
| Years of education           |                  | 14.97             | 2.63  | 15.05            | 2.67  | 14.93                | 2.62  | -0.25    | 0.80    |
| Number of MDE                |                  | 9.14              | 19.22 | 7.67             | 14.90 | 10.00                | 21.40 | 0.71     | 0.48    |
| Duration of current episode  |                  | 42.14             | 69.13 | 27.76            | 42.09 | 49.42                | 79.52 | 2.09     | 0.04    |
| HAMD <sub>17</sub>           |                  | 18.58             | 4.59  | 18.10            | 4.13  | 18.44                | 4.83  | 0.95     | 0.34    |

**TABLE S3.** Baseline sociodemographic and clinical variables for placebo remitters and placebo non remitters

|                              |                  | <u>Placebo</u> |       | <u>Remitters</u> |       | <u>Non Remitters</u> |       | $\chi^2$ | p value |
|------------------------------|------------------|----------------|-------|------------------|-------|----------------------|-------|----------|---------|
| <u>Categorical variables</u> |                  | n              | %     | n                | %     | n                    | %     |          |         |
| Gender                       |                  |                |       |                  |       |                      |       | .22      | .64     |
|                              | Male             | 52             | 37.14 | 14               | 34.15 | 38                   | 38.38 |          |         |
|                              | Female           | 88             | 62.86 | 27               | 65.85 | 61                   | 61.62 |          |         |
| Race                         |                  |                |       |                  |       |                      |       | 1.59     | .45     |
|                              | White            | 98             | 70.00 | 28               | 68.29 | 70                   | 70.71 |          |         |
|                              | African American | 22             | 15.71 | 5                | 12.20 | 17                   | 17.17 |          |         |
|                              | Other            | 20             | 14.29 | 8                | 19.51 | 12                   | 12.12 |          |         |
| Employment status            |                  |                |       |                  |       |                      |       | 2.17     | .34     |
|                              | Employed         | 76             | 54.29 | 25               | 60.98 | 51                   | 51.52 |          |         |
|                              | Unemployed       | 59             | 42.14 | 14               | 34.15 | 45                   | 45.45 |          |         |
|                              | Unknown          | 4              | 3.57  | 2                | 4.88  | 2                    | 2.02  |          |         |
| Site                         |                  |                |       |                  |       |                      |       | 11.63    | .01     |
|                              | CU               | 40             | 28.57 | 19               | 46.34 | 21                   | 21.21 |          |         |
|                              | MG               | 23             | 16.43 | 4                | 9.76  | 19                   | 19.19 |          |         |
|                              | TX               | 47             | 33.57 | 8                | 19.51 | 39                   | 39.39 |          |         |
|                              | UM               | 30             | 21.43 | 10               | 24.39 | 20                   | 20.20 |          |         |
| <u>Continuous variables</u>  |                  | Mean           | SD    | Mean             | SD    | Mean                 | SD    | t value  | p value |
| Age                          |                  | 37.00          | 13.00 | 32.95            | 11.79 | 38.40                | 12.87 | 2.42     | 0.02    |
| Age of onset                 |                  | 16.16          | 5.67  | 16.27            | 5.83  | 16.12                | 5.64  | -0.14    | 0.89    |
| Years of education           |                  | 15.18          | 2.68  | 15.15            | 2.28  | 15.19                | 2.83  | 0.10     | 0.92    |
| Number of MDE                |                  | 8.71           | 14.20 | 4.95             | 4.63  | 10.31                | 16.47 | 2.83     | 0.01    |
| Duration of current episode  |                  | 41.33          | 76.79 | 32.56            | 62.5  | 44.87                | 81.96 | 0.96     | 0.34    |
| HAMD <sub>17</sub>           |                  | 18.74          | 4.13  | 17.12            | 4.14  | 19.40                | 3.96  | 3.01     | <.01    |

**TABLE S4.** Terms in Linear Mixed Model

| Type of Variable      | Name of Variable                                              |
|-----------------------|---------------------------------------------------------------|
| Dependent Variable    | HAMD-17                                                       |
| Independent Variables | fcMRI                                                         |
|                       | Time – Time 0, Time 1, Time 2, Time 3, Time 4, Time 6, Time 8 |
|                       | * Site 1 – CU                                                 |
|                       | * Site 2 – MG                                                 |
|                       | * Site 3 – UM                                                 |
|                       | Treatment × Time                                              |
|                       | fcMRI × Time                                                  |
|                       | Site 1 × Time                                                 |
|                       | Site 2 × Time                                                 |
|                       | Site 3 × Time                                                 |
|                       | Site 1 × fcMRI                                                |
|                       | Site 2 × fcMRI                                                |
|                       | Site 3 × fcMRI                                                |
|                       | ** Treatment × Time × fcMRI                                   |
|                       | Treatment × Site 1 × Time                                     |
|                       | Treatment × Site 2 × Time                                     |
|                       | Treatment × Site 3 × Time                                     |
|                       | Site 1 × Time × fcMRI                                         |
|                       | Site 2 × Time × fcMRI                                         |
|                       | Site 3 × Time × fcMRI                                         |
|                       | Treatment × Site 1 × Time × fcMRI                             |
|                       | Treatment × Site 2 × Time × fcMRI                             |
|                       | Treatment × Site 3 × Time × fcMRI                             |

Note: \* TX used as reference site \*\* interaction of interest.

**TABLE S5.** Moderator effect driven by predictions only in the sertraline arm

| Seed                         | Target                        | Sertraline Arm            |         | Placebo Arm               |         | moderator<br>FDR<br>p value | LOO<br>correlation<br>coefficient | * Effect<br>Size |
|------------------------------|-------------------------------|---------------------------|---------|---------------------------|---------|-----------------------------|-----------------------------------|------------------|
|                              |                               | Regression<br>Coefficient | p value | Regression<br>Coefficient | p value |                             |                                   |                  |
| DAN_Precuneus(L)             | DMN_InferiorTemporal(L)       | -7.70                     | <0.01   | 1.35                      | 0.46    | 0.04                        | 0.29                              | -0.10            |
| DAN_Precuneus(L)             | ECN_Striatum(L)               | -6.40                     | <0.01   | 2.95                      | 0.27    | 0.02                        | 0.29                              | -0.19            |
| DMN_InferiorTemporal(R)      | DMN_MiddleFrontal(L)          | -11.42                    | <0.01   | -2.26                     | 0.28    | 0.04                        | 0.30                              | -0.10            |
| DMN_InferiorFrontal(R)       | DMN_SuperiorMedialFrontal(L)  | -8.59                     | <0.01   | -0.12                     | 0.94    | 0.04                        | 0.32                              | -0.12            |
| DMN_Angular(L)               | DMN_InferiorFrontal(L)        | -7.30                     | <0.01   | 1.54                      | 0.42    | 0.02                        | 0.31                              | -0.11            |
| DMN_MiddleFrontal(L)         | DMN_OrbitalInferiorFrontal(R) | -6.62                     | <0.01   | 3.10                      | 0.14    | <0.01                       | 0.27                              | -0.13            |
| DMN_Angular(L)               | DMN_OrbitalInferiorFrontal(R) | -6.06                     | <0.01   | 3.34                      | 0.11    | 0.04                        | 0.25                              | -0.10            |
| DMN_MedialOrbitofrontal(L)   | DMN_MiddleFrontal(R)          | -5.99                     | 0.01    | 0.29                      | 0.86    | 0.05                        | 0.32                              | -0.12            |
| DMN_Angular(R)               | DMN_Angular(L)                | -5.75                     | 0.01    | 0.96                      | 0.52    | 0.03                        | 0.30                              | -0.13            |
| DMN_InferiorOrbitofrontal(L) | DMN_Precuneus(R)              | -5.19                     | 0.02    | 1.83                      | 0.34    | 0.03                        | 0.25                              | -0.14            |
| DMN_MiddleTemporal(R)        | DMN_Precuneus(L)              | -5.01                     | 0.03    | 2.10                      | 0.31    | 0.04                        | 0.26                              | -0.12            |
| DMN_InferiorFrontal(R)       | DMN_PosteriorCingulate(L)     | -4.71                     | 0.02    | 1.54                      | 0.36    | 0.04                        | 0.25                              | -0.15            |
| DMN_MiddleFrontal(R)         | DMN_PosteriorCingulate(L)     | -4.51                     | 0.03    | 1.07                      | 0.53    | 0.04                        | 0.31                              | -0.13            |
| DMN_InferiorOrbitofrontal(L) | DMN_Precuneus(L)              | -4.45                     | 0.04    | 3.36                      | 0.11    | 0.01                        | 0.30                              | -0.22            |
| DMN_MiddleFrontal(L)         | DMN_SuperiorTemporal(R)       | -4.27                     | 0.05    | 3.16                      | 0.14    | 0.01                        | 0.31                              | -0.19            |
| DMN_MiddleFrontal(L)         | DMN_PosteriorCingulate(L)     | -4.22                     | 0.05    | 1.82                      | 0.33    | 0.05                        | 0.29                              | -0.15            |
| DMN_MiddleFrontal(L)         | ECN_Striatum(L)               | -7.13                     | 0.01    | 2.85                      | 0.31    | 0.04                        | 0.29                              | -0.17            |
| DMN_PosteriorCingulate(L)    | LN_TemporalPole(R)            | -7.22                     | <0.01   | 3.05                      | 0.13    | 0.03                        | 0.28                              | -0.11            |
| DMN_MiddleFrontal(R)         | Amygdala(R)                   | -4.71                     | 0.08    | 4.83                      | 0.13    | 0.03                        | 0.28                              | -0.13            |
| DMN_Precuneus(L)             | SN_Striatum(L)                | -7.09                     | 0.01    | 2.57                      | 0.37    | 0.05                        | 0.28                              | -0.13            |
| ECN_InferiorParietal(L)      | ECN_OrbitalMiddleFrontal(R)   | -7.86                     | <0.01   | 1.66                      | 0.37    | 0.02                        | 0.30                              | -0.05            |
| ECN_Precuneus(R)             | VN_Calcarine(L)               | -4.87                     | 0.02    | 2.85                      | 0.21    | 0.05                        | 0.25                              | -0.11            |
| Hippocampus_LC(L)            | Amygdala(L)                   | -9.85                     | <0.01   | 1.83                      | 0.58    | 0.02                        | 0.30                              | -0.06            |
| Hippocampus_RA(R)            | SMN_Paracentral(L)            | -9.07                     | <0.01   | 2.05                      | 0.41    | 0.04                        | 0.33                              | -0.08            |

| Seed                        | Target                  | Sertraline Arm            |         | Placebo Arm               |         | moderator<br>FDR<br>p value | LOO<br>correlation<br>coefficient | * Effect<br>Size |
|-----------------------------|-------------------------|---------------------------|---------|---------------------------|---------|-----------------------------|-----------------------------------|------------------|
|                             |                         | Regression<br>Coefficient | p value | Regression<br>Coefficient | p value |                             |                                   |                  |
| LN_InferiorTemporal(L)      | DAN_SuperiorParietal(R) | -9.92                     | <0.01   | 3.89                      | 0.08    | <0.01                       | 0.31                              | -0.14            |
| LN_Striatum(R)              | VN_MiddleOccipital(R)   | -11.05                    | <0.01   | 0.98                      | 0.69    | 0.04                        | 0.27                              | -0.03            |
| SMN_Paracentral(L)          | SN_SuperiorTemporal(R)  | -6.23                     | <0.01   | 2.89                      | 0.15    | 0.01                        | 0.28                              | -0.11            |
| SMN_SuperiorTemporal(L)     | SN_AnteriorInsula (L)   | -3.79                     | 0.04    | 3.69                      | 0.05    | 0.04                        | 0.27                              | -0.13            |
| VN_Fusiform(R)              | VN_Fusiform(R)          | -4.91                     | 0.03    | 2.53                      | 0.28    | 0.03                        | 0.30                              | -0.10            |
| DMN_InferiorFrontal(L)      | SMN_Striatum(R)         | 6.62                      | 0.03    | -3.63                     | 0.14    | 0.04                        | 0.27                              | 0.07             |
| Hippocampus_RA(R)           | VN_SuperiorOccipital(L) | 7.35                      | 0.01    | -4.33                     | 0.10    | 0.03                        | 0.26                              | 0.04             |
| DMN_Striatum(L)             | LN_TemporalPole(R)      | 7.51                      | 0.01    | -2.92                     | 0.19    | 0.02                        | 0.28                              | 0.11             |
| LN_TemporalPole(R)          | Thalamus(R)             | 7.52                      | <0.01   | -3.01                     | 0.28    | 0.04                        | 0.25                              | 0.10             |
| SMN_Postcentral(R)          | SN_Striatum(L)          | 8.89                      | <0.01   | -6.21                     | 0.06    | <0.01                       | 0.27                              | 0.13             |
| ECN_OrbitalMiddleFrontal(R) | SN_Striatum(R)          | 8.98                      | <0.01   | -2.98                     | 0.25    | 0.04                        | 0.28                              | -0.04            |
| DMN_InferiorFrontal(L)      | SN_Striatum(L)          | 10.65                     | <0.01   | -4.96                     | 0.07    | 0.01                        | 0.22                              | 0.09             |

\* Sign of effect size indicates whether the outcome is favored by high connectivity or low connectivity. Positive effect size indicates that higher connectivity is associated with better outcome with placebo.



**TABLE S6.** Moderator effect driven by predictions only in the placebo arm

| Seed                         | Target                      | Sertraline Arm            |         | Placebo Arm               |         | moderator<br>FDR<br>p value | LOO<br>correlation<br>coefficient | * Effect<br>Size |
|------------------------------|-----------------------------|---------------------------|---------|---------------------------|---------|-----------------------------|-----------------------------------|------------------|
|                              |                             | Regression<br>Coefficient | p value | Regression<br>Coefficient | p value |                             |                                   |                  |
| DAN_Striatum(R)              | ECN_Striatum(R)             | -0.69                     | 0.80    | -11.84                    | <0.01   | 0.04                        | 0.29                              | 0.14             |
| DAN_SuperiorParietal(L)      | Hippocampus_LA(L)           | 5.55                      | 0.05    | -6.16                     | 0.02    | 0.05                        | 0.25                              | 0.07             |
| DAN_Striatum(R)              | LN_Amygdala(R)              | 5.02                      | 0.07    | -10.05                    | <0.01   | 0.01                        | 0.29                              | 0.13             |
| DAN_Striatum(R)              | SN_Striatum(L)              | 2.19                      | 0.43    | -12.60                    | <0.01   | 0.01                        | 0.29                              | 0.14             |
| DMN_Precuneus(L)             | DAN_Precuneus(R)            | 3.13                      | 0.14    | -4.25                     | 0.02    | 0.04                        | 0.33                              | 0.07             |
| DMN_InferiorOrbitofrontal(L) | ECN_OrbitalMiddleFrontal(R) | 2.68                      | 0.24    | -9.72                     | <0.01   | 0.01                        | 0.29                              | 0.11             |
| DMN_MiddleFrontal(L)         | LN_Striatum(R)              | 1.59                      | 0.56    | -13.01                    | <0.01   | 0.02                        | 0.30                              | 0.07             |
| DMN_MiddleTemporal(L)        | LN_InferiorTemporal(L)      | 4.24                      | 0.11    | -8.31                     | <0.01   | 0.01                        | 0.30                              | 0.11             |
| DMN_MiddleFrontal(L)         | SMN_SuperiorTemporal(L)     | 1.77                      | 0.40    | -10.44                    | <0.01   | <0.01                       | 0.33                              | 0.09             |
| DMN_MiddleFrontal(L)         | SMN_SuperiorTemporal(R)     | 1.46                      | 0.53    | -6.04                     | 0.01    | 0.04                        | 0.33                              | 0.05             |
| DMN_InferiorTemporal(R)      | SMN_SuperiorTemporal(L)     | 3.38                      | 0.11    | -4.78                     | 0.01    | 0.03                        | 0.31                              | 0.16             |
| DMN_AnteriorCingulate(R)     | SN_SuperiorTemporal(R)      | 2.64                      | 0.16    | -5.70                     | <0.01   | 0.04                        | 0.29                              | 0.05             |
| DMN_InferiorTemporal(R)      | SN_SuperiorTemporal(R)      | 3.71                      | 0.05    | -5.10                     | <0.01   | 0.03                        | 0.27                              | 0.12             |
| ECN_Striatum(L)              | DAN_MiddleTemporal(R)       | 4.02                      | 0.09    | -9.12                     | <0.01   | 0.01                        | 0.29                              | 0.04             |
| ECN_Striatum(L)              | DAN_Postcentral(R)          | 2.56                      | 0.32    | -8.33                     | <0.01   | 0.04                        | 0.26                              | 0.10             |
| ECN_Precuneus(R)             | Hippocampus_LC(L)           | 2.74                      | 0.31    | -12.86                    | <0.01   | <0.01                       | 0.32                              | 0.05             |
| ECN_Precuneus(L)             | Hippocampus_RC(R)           | 1.86                      | 0.45    | -10.16                    | <0.01   | 0.01                        | 0.27                              | 0.07             |
| ECN_MiddleCingulate(R)       | Hippocampus_LA(L)           | 4.14                      | 0.11    | -8.97                     | <0.01   | 0.03                        | 0.27                              | 0.11             |
| ECN_MiddleCingulate(R)       | Hippocampus_RC(R)           | 1.60                      | 0.48    | -8.60                     | <0.01   | 0.02                        | 0.26                              | 0.05             |
| ECN_Precuneus(R)             | Hippocampus_RC(R)           | 3.02                      | 0.21    | -8.13                     | <0.01   | 0.04                        | 0.29                              | 0.02             |
| ECN_Striatum(R)              | LN_TemporalPole(R)          | 4.44                      | 0.13    | -7.58                     | 0.01    | 0.03                        | 0.27                              | 0.08             |

| Seed                          | Target                       | Sertraline Arm            |         | Placebo Arm               |         | moderator<br>FDR<br>p value | LOO<br>correlation<br>coefficient | * Effect<br>Size |
|-------------------------------|------------------------------|---------------------------|---------|---------------------------|---------|-----------------------------|-----------------------------------|------------------|
|                               |                              | Regression<br>Coefficient | p value | Regression<br>Coefficient | p value |                             |                                   |                  |
| ECN_Striatum(R)               | SN_Supramarginal (L)         | 0.57                      | 0.83    | -9.40                     | <0.01   | 0.02                        | 0.31                              | 0.07             |
| ECN_MiddleFrontal(R)          | SN_MiddleFrontal(L)          | -0.38                     | 0.82    | -7.91                     | <0.01   | <0.01                       | 0.31                              | 0.15             |
| ECN_Striatum(L)               | SN_SupplementaryMotorArea(R) | 3.38                      | 0.27    | -6.09                     | 0.03    | 0.04                        | 0.25                              | 0.12             |
| ECN_OrbitalMiddleFrontal(R)   | VN_InferiorOccipital(R)      | 3.30                      | 0.15    | -6.56                     | <0.01   | <0.01                       | 0.31                              | 0.06             |
| ECN_Supramarginal(R)          | VN_InferiorOccipital(R)      | 0.86                      | 0.67    | -5.64                     | <0.01   | 0.04                        | 0.30                              | 0.12             |
| SN_PosteriorInsula (L)        | VN_Lingual(L)                | 0.57                      | 0.78    | -11.15                    | <0.01   | 0.03                        | 0.28                              | -0.02            |
| DAN_Superior Frontal (L)      | DMN_MiddleTemporal(L)        | -3.95                     | 0.07    | 4.68                      | 0.03    | <0.01                       | 0.32                              | -0.23            |
| DAN_InferiorFrontal(R)        | ECN_MiddleCingulate(R)       | -0.49                     | 0.80    | 6.85                      | <0.01   | 0.01                        | 0.34                              | -0.14            |
| DAN_InferiorFrontal(R)        | ECN_MiddleCingulate(L)       | -0.91                     | 0.64    | 7.42                      | <0.01   | 0.01                        | 0.34                              | -0.17            |
| DAN_SuperiorParietal(L)       | ECN_Striatum(R)              | -2.00                     | 0.52    | 8.72                      | <0.01   | 0.03                        | 0.25                              | -0.14            |
| DAN_Striatum(R)               | SMN_Precentral(L)            | -1.21                     | 0.66    | 9.70                      | <0.01   | 0.04                        | 0.28                              | -0.03            |
| DAN_InferiorFrontal(R)        | SN_MiddleCingulate(L)        | 0.24                      | 0.90    | 5.59                      | 0.01    | 0.04                        | 0.30                              | -0.21            |
| DAN_MiddleTemporal(R)         | SN_MiddleFrontal(L)          | -1.52                     | 0.45    | 9.07                      | <0.01   | 0.03                        | 0.27                              | -0.13            |
| DMN_MiddleFrontal(L)          | DMN_PosteriorCingulate(L)    | -4.22                     | 0.05    | 1.82                      | 0.33    | 0.05                        | 0.29                              | -0.15            |
| DMN_MiddleFrontal(L)          | DMN_SuperiorTemporal(R)      | -4.27                     | 0.05    | 3.16                      | 0.14    | 0.01                        | 0.31                              | -0.19            |
| DMN_OrbitalInferiorFrontal(R) | DMN_Precuneus(L)             | -2.27                     | 0.27    | 4.47                      | 0.03    | 0.03                        | 0.26                              | -0.11            |
| DMN_OrbitalInferiorFrontal(R) | DMN_PosteriorCingulate(L)    | -2.43                     | 0.27    | 4.65                      | 0.02    | 0.04                        | 0.25                              | -0.12            |
| DMN_PosteriorCingulate(L)     | ECN_Striatum(R)              | -4.30                     | 0.10    | 6.59                      | 0.01    | 0.01                        | 0.30                              | -0.19            |
| DMN_MiddleFrontal(R)          | Amygdala(R)                  | -4.71                     | 0.08    | 4.83                      | 0.13    | 0.03                        | 0.28                              | -0.13            |
| DMN_InferiorOrbitofrontal(L)  | LN_Striatum(L)               | -0.72                     | 0.80    | 9.69                      | <0.01   | 0.04                        | 0.29                              | -0.08            |
| DMN_Precuneus(L)              | SMN_Precentral(L)            | -1.50                     | 0.57    | 6.58                      | 0.01    | 0.05                        | 0.25                              | -0.11            |
| DMN_Striatum(R)               | Thalamus(L)                  | -3.99                     | 0.12    | 8.34                      | <0.01   | 0.04                        | 0.28                              | -0.09            |
| DMN_Precuneus(R)              | VN_MiddleTemporal(L)         | -3.50                     | 0.11    | 3.76                      | 0.06    | 0.03                        | 0.33                              | -0.13            |
| DMN_InferiorOrbitofrontal(L)  | VN_Fusiform(R)               | -2.40                     | 0.26    | 4.17                      | 0.07    | 0.03                        | 0.30                              | -0.19            |
| DMN_InferiorOrbitofrontal(L)  | VN_Fusiform(L)               | -2.12                     | 0.43    | 6.46                      | 0.01    | 0.03                        | 0.27                              | -0.13            |
| ECN_MiddleCingulate(L)        | ECN_MiddleFrontal(R)         | -2.12                     | 0.40    | 5.80                      | 0.01    | 0.03                        | 0.32                              | -0.19            |

| Seed                   | Target                       | Sertraline Arm            |         | Placebo Arm               |         | moderator<br>FDR<br>p value | LOO<br>correlation<br>coefficient | * Effect<br>Size |
|------------------------|------------------------------|---------------------------|---------|---------------------------|---------|-----------------------------|-----------------------------------|------------------|
|                        |                              | Regression<br>Coefficient | p value | Regression<br>Coefficient | p value |                             |                                   |                  |
| ECN_InferiorFrontal(R) | ECN_MiddleCingulate(L)       | -2.35                     | 0.25    | 7.93                      | <0.01   | <0.01                       | 0.32                              | -0.14            |
| ECN_Precueus(L)        | LN_Striatum(L)               | -0.96                     | 0.68    | 9.95                      | <0.01   | 0.01                        | 0.27                              | -0.11            |
| ECN_Precueus(R)        | SN_Striatum(R)               | -3.73                     | 0.13    | 4.34                      | 0.06    | 0.03                        | 0.30                              | -0.24            |
| ECN_Precueus(L)        | SN_Striatum(L)               | -2.97                     | 0.21    | 8.88                      | <0.01   | <0.01                       | 0.32                              | -0.18            |
| ECN_MiddleCingulate(R) | SN_Striatum(R)               | -2.04                     | 0.48    | 9.34                      | <0.01   | 0.02                        | 0.31                              | -0.12            |
| LN_Striatum(L)         | SMN_SuperiorTemporal(L)      | -4.09                     | 0.08    | 6.42                      | 0.06    | 0.04                        | 0.28                              | -0.06            |
| LN_Striatum(R)         | SMN_Precentral(L)            | -3.87                     | 0.21    | 8.37                      | 0.01    | 0.02                        | 0.26                              | -0.09            |
| LN_Striatum(R)         | SMN_SuperiorTemporal(L)      | -3.40                     | 0.20    | 9.12                      | <0.01   | <0.01                       | 0.32                              | -0.17            |
| LN_Striatum(R)         | SMN_Postcentral(R)           | -1.02                     | 0.73    | 11.76                     | <0.01   | 0.03                        | 0.29                              | -0.06            |
| Amygdala(L)            | VN_Lingual(L)                | -4.24                     | 0.08    | 5.18                      | 0.05    | 0.03                        | 0.32                              | -0.15            |
| LN_Striatum(R)         | VN_Calcarine(R)              | -4.28                     | 0.12    | 8.17                      | <0.01   | <0.01                       | 0.30                              | -0.21            |
| LN_Striatum(R)         | VN_Lingual(R)                | -2.63                     | 0.36    | 11.26                     | <0.01   | <0.01                       | 0.31                              | -0.18            |
| LN_Striatum(R)         | VN_Calcarine(L)              | -2.24                     | 0.42    | 12.35                     | <0.01   | <0.01                       | 0.32                              | -0.21            |
| SMN_Precentral(R)      | SN_AnteriorCingulate(L)      | -2.35                     | 0.25    | 6.16                      | 0.02    | 0.05                        | 0.30                              | -0.07            |
| SMN_Striatum(L)        | SN_MiddleCingulate(R)        | -3.71                     | 0.11    | 8.38                      | 0.01    | 0.02                        | 0.32                              | -0.14            |
| SMN_Striatum(L)        | VN_Calcarine(L)              | -0.06                     | 0.98    | 7.84                      | <0.01   | 0.04                        | 0.28                              | -0.11            |
| SN_MiddleCingulate(L)  | SN_SupplementaryMotorArea(R) | -1.41                     | 0.51    | 6.92                      | <0.01   | 0.01                        | 0.31                              | -0.16            |
| SN_PosteriorInsula (L) | Thalamus(L)                  | 1.03                      | 0.63    | 10.16                     | <0.01   | 0.05                        | 0.29                              | -0.04            |
| SN_Insula(R)           | Thalamus(L)                  | 0.39                      | 0.88    | 10.85                     | <0.01   | 0.03                        | 0.30                              | -0.04            |
| Thalamus(L)            | VN_Lingual(R)                | -2.17                     | 0.31    | 5.66                      | 0.01    | 0.04                        | 0.27                              | -0.12            |
| Thalamus(L)            | VN_Calcarine(L)              | -3.55                     | 0.09    | 5.87                      | 0.01    | 0.01                        | 0.30                              | -0.16            |

\* Sign of effect size indicates whether the outcome is favored by high connectivity or low connectivity. Positive effect size indicates that higher connectivity is associated with better outcome with placebo.

**TABLE S7.** Moderator effect driven by opposite direction predictions in the sertraline and placebo arms

| Seed                         | Target                       | Sertraline Arm            |         | Placebo Arm               |         | Moderator<br>FDR<br>p value | LOO<br>correlation<br>coefficient | * Effect<br>Size |
|------------------------------|------------------------------|---------------------------|---------|---------------------------|---------|-----------------------------|-----------------------------------|------------------|
|                              |                              | Regression<br>Coefficient | p value | Regression<br>Coefficient | p value |                             |                                   |                  |
| SN_Striatum(R)               | VN_SuperiorOccipital(L)      | -7.43                     | 0.02    | 6.63                      | <0.01   | 0.02                        | 0.27                              | -0.11            |
| Hippocampus_RA(R)            | SN_AnteriorInsula (L)        | -6.78                     | 0.03    | 8.74                      | <0.01   | <0.01                       | 0.34                              | -0.22            |
| ECN_Precueus(L)              | ECN_Striatum(R)              | -6.27                     | 0.01    | 5.79                      | 0.02    | <0.01                       | 0.33                              | -0.13            |
| DMN_Striatum(R)              | ECN_Precueus(L)              | -5.49                     | 0.02    | 6.73                      | 0.01    | 0.01                        | 0.33                              | -0.11            |
| DAN_PostCentral(L)           | DMN_MiddleTemporal(L)        | -5.01                     | 0.01    | 4.99                      | 0.01    | <0.01                       | 0.30                              | -0.15            |
| SMN_Striatum(R)              | SN_MiddleCingulate(L)        | -5.00                     | 0.03    | 8.89                      | <0.01   | <0.01                       | 0.31                              | -0.22            |
| DMN_MiddleTemporal(L)        | SMN_Precentral(L)            | -4.93                     | 0.01    | 4.17                      | 0.04    | 0.02                        | 0.25                              | -0.12            |
| DMN_InferiorFrontal(R)       | ECN_MiddleCingulate(L)       | -4.66                     | 0.03    | 6.60                      | 0.01    | <0.01                       | 0.31                              | -0.23            |
| DMN_MiddleTemporal(L)        | SN_SupplementaryMotorArea(L) | -4.65                     | 0.04    | 6.04                      | 0.01    | 0.01                        | 0.29                              | -0.15            |
| DMN_MiddleTemporal(L)        | SN_MiddleFrontal(L)          | -4.40                     | 0.04    | 5.58                      | 0.01    | 0.01                        | 0.27                              | -0.18            |
| VN_Calcarine(R)              | VN_Cuneus(R)                 | -3.98                     | 0.01    | 3.07                      | 0.03    | 0.02                        | 0.29                              | -0.09            |
| ECN_Angular(R)               | SMN_SuperiorTemporal(L)      | 4.76                      | 0.02    | -5.12                     | 0.02    | 0.03                        | 0.26                              | 0.07             |
| DMN_InferiorOrbitofrontal(L) | SN_Striatum(L)               | 5.30                      | 0.04    | -7.88                     | 0.02    | 0.04                        | 0.24                              | 0.05             |
| SN_Striatum(L)               | SN_Supramarginal(R)          | 5.90                      | 0.01    | -9.91                     | <0.01   | <0.01                       | 0.31                              | 0.21             |
| Hippocampus_LA(L)            | VN_SuperiorOccipital(L)      | 6.05                      | 0.04    | -10.40                    | <0.01   | <0.01                       | 0.30                              | 0.15             |
| DMN_Striatum(R)              | LN_TemporalPole(R)           | 6.05                      | 0.02    | -6.91                     | <0.01   | <0.01                       | 0.29                              | 0.08             |
| ECN_OrbitalMiddleFrontal(R)  | SMN_SuperiorTemporal(R)      | 6.11                      | 0.01    | -6.11                     | 0.01    | <0.01                       | 0.31                              | 0.06             |
| SMN_RolandicOperculum(R)     | SN_Striatum(L)               | 6.16                      | 0.02    | -8.23                     | 0.01    | <0.01                       | 0.34                              | 0.11             |
| LN_InferiorTemporal(L)       | SMN_Insula (L)               | 6.39                      | 0.01    | -7.09                     | <0.01   | <0.01                       | 0.36                              | 0.10             |
| Hippocampus_LC(L)            | Thalamus(L)                  | 6.46                      | 0.04    | -7.76                     | <0.01   | 0.03                        | 0.29                              | -0.05            |
| DMN_SuperiorTemporal(R)      | ECN_OrbitalMiddleFrontal(R)  | 6.48                      | <0.01   | -5.95                     | 0.01    | 0.02                        | 0.30                              | -0.04            |
| Hippocampus_LA(L)            | VN_Cuneus(L)                 | 6.75                      | 0.02    | -7.06                     | 0.01    | 0.02                        | 0.25                              | 0.10             |
| ECN_Supramarginal(R)         | SN_Striatum(L)               | 6.76                      | 0.02    | -6.04                     | 0.05    | 0.01                        | 0.30                              | 0.04             |
| DMN_InferiorOrbitofrontal(L) | ECN_MiddleFrontal(R)         | 6.83                      | <0.01   | -6.50                     | 0.01    | <0.01                       | 0.30                              | 0.17             |

| Seed                        | Target                  | Sertraline Arm            |         | Placebo Arm               |         | Moderator<br>FDR<br>p value | LOO<br>correlation<br>coefficient | * Effect<br>Size |
|-----------------------------|-------------------------|---------------------------|---------|---------------------------|---------|-----------------------------|-----------------------------------|------------------|
|                             |                         | Regression<br>Coefficient | p value | Regression<br>Coefficient | p value |                             |                                   |                  |
| DAN_SuperiorParietal(L)     | Hippocampus_RC(R)       | 6.97                      | 0.02    | -12.01                    | <0.01   | <0.01                       | 0.30                              | 0.14             |
| ECN_OrbitalMiddleFrontal(R) | SMN_SuperiorTemporal(L) | 6.98                      | <0.01   | -7.65                     | <0.01   | <0.01                       | 0.30                              | 0.08             |
| LN_Amygdala(L)              | SN_Supramarginal (L)    | 7.01                      | 0.01    | -4.71                     | 0.04    | 0.03                        | 0.25                              | 0.06             |
| LN_InferiorTemporal(L)      | SMN_SuperiorTemporal(L) | 7.14                      | <0.01   | -6.28                     | <0.01   | <0.01                       | 0.36                              | 0.14             |
| DAN_Striatum(L)             | ECN_Angular(R)          | 7.34                      | 0.01    | -7.78                     | 0.02    | 0.03                        | 0.31                              | 0.01             |
| ECN_OrbitalMiddleFrontal(R) | SN_SuperiorTemporal(R)  | 7.38                      | <0.01   | -7.65                     | <0.01   | <0.01                       | 0.33                              | 0.09             |
| DAN_Striatum(L)             | DMN_InferiorTemporal(R) | 7.38                      | 0.02    | -9.35                     | 0.01    | 0.01                        | 0.31                              | 0.05             |
| Hippocampus_LA(L)           | VN_Calcarine(R)         | 8.10                      | <0.01   | -5.23                     | 0.05    | 0.01                        | 0.29                              | 0.14             |
| Hippocampus_LA(L)           | VN_Lingual(R)           | 8.65                      | <0.01   | -6.52                     | 0.03    | 0.04                        | 0.25                              | 0.12             |
| DAN_SuperiorParietal(L)     | Hippocampus_LA(L)       | 9.07                      | 0.02    | -8.31                     | <0.01   | 0.03                        | 0.25                              | 0.05             |
| DAN_Striatum(L)             | LN_TemporalPole(R)      | 9.20                      | <0.01   | -6.48                     | 0.04    | 0.01                        | 0.31                              | 0.10             |
| ECN_Precuneus(R)            | Hippocampus_LA(L)       | 9.76                      | <0.01   | -6.81                     | 0.01    | 0.01                        | 0.26                              | 0.09             |
| LN_InferiorTemporal(L)      | SMN_SuperiorTemporal(R) | 9.88                      | <0.01   | -4.34                     | 0.03    | <0.01                       | 0.31                              | 0.14             |

\* Sign of effect size indicates whether the outcome is favored by high connectivity or low connectivity. Positive effect size indicates that higher connectivity is associated with better outcome with placebo.

**TABLE S8.** Sensitivity and specificity for moderators

| Seed                         | Target                        | Sensitivity | Specificity |
|------------------------------|-------------------------------|-------------|-------------|
| DAN_Precuneus(L)             | DMN_InferiorTemporal(L)       | 0.46        | 0.70        |
| DAN_Precuneus(L)             | ECN_Striatum(R)               | 0.34        | 0.74        |
| DMN_InferiorTemporal(R)      | DMN_MiddleFrontal(L)          | 0.46        | 0.67        |
| DMN_InferiorFrontal(R)       | DMN_SuperiorMedialFrontal(L)  | 0.77        | 0.36        |
| DMN_Angular(L)               | DMN_InferiorFrontal(L)        | 0.39        | 0.68        |
| DMN_MiddleFrontal(L)         | DMN_OrbitalInferiorFrontal(R) | 1.00        | 0.01        |
| DMN_Angular(L)               | DMN_OrbitalInferiorFrontal(R) | 1.00        | 0.01        |
| DMN_MedialOrbitofrontal(L)   | DMN_MiddleFrontal(R)          | 0.44        | 0.66        |
| DMN_Angular(R)               | DMN_Angular(L)                | 0.38        | 0.75        |
| DMN_InferiorOrbitofrontal(L) | DMN_Precuneus(R)              | 0.86        | 0.20        |
| DMN_MiddleTemporal(R)        | DMN_Precuneus(L)              | 0.52        | 0.60        |
| DMN_InferiorFrontal(R)       | DMN_PosteriorCingulate(L)     | 0.29        | 0.79        |
| DMN_MiddleFrontal(R)         | DMN_PosteriorCingulate(L)     | 0.29        | 0.79        |
| DMN_InferiorOrbitofrontal(L) | DMN_Precuneus(L)              | 0.52        | 0.60        |
| DMN_MiddleFrontal(L)         | DMN_SuperiorTemporal(R)       | 0.64        | 0.43        |
| DMN_MiddleFrontal(L)         | DMN_PosteriorCingulate(L)     | 0.29        | 0.79        |
| DMN_MiddleFrontal(L)         | ECN_Striatum(R)               | 0.34        | 0.74        |
| DMN_PosteriorCingulate(L)    | LN_TemporalPole(R)            | 0.41        | 0.68        |
| DMN_MiddleFrontal(R)         | LN_Amygdala(L)                | 0.91        | 0.15        |
| DMN_Precuneus(L)             | SN_Striatum(L)                | 0.14        | 0.90        |
| ECN_InferiorParietal(L)      | ECN_OrbitalMiddleFrontal(R)   | 0.19        | 0.83        |
| ECN_Precuneus(R)             | VN_Calcarine(L)               | 0.39        | 0.69        |
| Hippocampus_LC(L)            | Amygdala(L)                   | 0.39        | 0.68        |
| Hippocampus_RA(R)            | SMN_Paracentral(L)            | 0.52        | 0.56        |

| Seed                         | Target                      | Sensitivity | Specificity |
|------------------------------|-----------------------------|-------------|-------------|
| LN_InferiorTemporal(L)       | DAN_SuperiorParietal(R)     | 1.00        | 0.01        |
| LN_Striatum(R)               | VN_MiddleOccipital(R)       | 0.99        | 0.06        |
| SMN_Paracentral(L)           | SN_SuperiorTemporal(R)      | 0.66        | 0.51        |
| SMN_SuperiorTemporal(L)      | SN_AnteriorInsula (L)       | 0.67        | 0.36        |
| VN_Fusiform(R)               | VN_Fusiform(R)              | 1.00        | 0.03        |
| DMN_InferiorFrontal(L)       | SMN_Striatum(R)             | 0.59        | 0.47        |
| Hippocampus_RA(R)            | VN_SuperiorOccipital(L)     | 0.51        | 0.56        |
| DMN_Striatum(L)              | LN_TemporalPole(R)          | 0.41        | 0.68        |
| LN_TemporalPole(R)           | Thalamus(R)                 | 0.07        | 0.97        |
| SMN_Postcentral(R)           | SN_Striatum(L)              | 0.14        | 0.90        |
| ECN_OrbitalMiddleFrontal(R)  | SN_Striatum(R)              | 0.30        | 0.76        |
| DMN_InferiorFrontal(L)       | SN_Striatum(L)              | 0.14        | 0.90        |
| DAN_Striatum(R)              | ECN_Striatum(R)             | 0.34        | 0.74        |
| DAN_SuperiorParietal(L)      | Hippocampus_RA(R)           | 0.86        | 0.21        |
| DAN_Striatum(R)              | Amygdala(L)                 | 0.39        | 0.68        |
| DAN_Striatum(R)              | SN_Striatum(R)              | 0.14        | 0.90        |
| DMN_Precuneus(L)             | DAN_Precuneus(R)            | 0.16        | 0.88        |
| DMN_InferiorOrbitofrontal(L) | ECN_OrbitalMiddleFrontal(R) | 0.19        | 0.83        |
| DMN_MiddleFrontal(L)         | LN_Striatum(R)              | 0.43        | 0.72        |
| DMN_MiddleTemporal(L)        | LN_InferiorTemporal(L)      | 0.26        | 0.84        |
| DMN_MiddleFrontal(L)         | SMN_SuperiorTemporal(L)     | 0.76        | 0.38        |
| DMN_MiddleFrontal(L)         | SMN_SuperiorTemporal(R)     | 0.36        | 0.76        |
| DMN_InferiorTemporal(R)      | SMN_SuperiorTemporal(L)     | 0.76        | 0.38        |
| DMN_AnteriorCingulate(R)     | SN_SuperiorTemporal(R)      | 0.66        | 0.51        |
| DMN_InferiorTemporal(R)      | SN_SuperiorTemporal(R)      | 0.66        | 0.51        |

| Seed                          | Target                       | Sensitivity | Specificity |
|-------------------------------|------------------------------|-------------|-------------|
| ECN_Striatum(L)               | DAN_MiddleTemporal(R)        | 0.39        | 0.65        |
| ECN_Striatum(L)               | DAN_Postcentral(R)           | 0.32        | 0.80        |
| ECN_Precuneus(R)              | Hippocampus_LC(L)            | 0.46        | 0.63        |
| ECN_Precuneus(L)              | Hippocampus_RC(R)            | 0.24        | 0.84        |
| ECN_MiddleCingulate(R)        | Hippocampus_LA(L)            | 0.84        | 0.27        |
| ECN_MiddleCingulate(R)        | Hippocampus_RC(R)            | 0.24        | 0.84        |
| ECN_Precuneus(R)              | Hippocampus_RC(R)            | 0.24        | 0.84        |
| ECN_Striatum(R)               | LN_TemporalPole(R)           | 0.41        | 0.68        |
| ECN_Striatum(R)               | SN_Supramarginal (L)         | 0.92        | 0.13        |
| ECN_MiddleFrontal(R)          | SN_MiddleFrontal(L)          | 0.34        | 0.75        |
| ECN_Striatum(L)               | SN_SupplementaryMotorArea(R) | 0.61        | 0.47        |
| ECN_OrbitalMiddleFrontal(R)   | VN_InferiorOccipital(R)      | 0.87        | 0.16        |
| ECN_Supramarginal(R)          | VN_InferiorOccipital(R)      | 0.87        | 0.16        |
| SN_PosteriorInsula (L)        | VN_Lingual(L)                | 0.08        | 0.97        |
| DAN_Superior Frontal (L)      | DMN_MiddleTemporal(L)        | 0.59        | 0.54        |
| DAN_InferiorFrontal(R)        | ECN_MiddleCingulate(R)       | 0.34        | 0.75        |
| DAN_InferiorFrontal(R)        | ECN_MiddleCingulate(L)       | 0.29        | 0.81        |
| DAN_SuperiorParietal(L)       | ECN_Striatum(R)              | 0.34        | 0.74        |
| DAN_Striatum(R)               | SMN_Precentral(L)            | 0.26        | 0.83        |
| DAN_InferiorFrontal(R)        | SN_MiddleCingulate(L)        | 0.17        | 0.90        |
| DAN_MiddleTemporal(R)         | SN_MiddleFrontal(L)          | 0.34        | 0.75        |
| DMN_MiddleFrontal(L)          | DMN_PosteriorCingulate(L)    | 0.29        | 0.79        |
| DMN_MiddleFrontal(L)          | DMN_SuperiorTemporal(R)      | 0.64        | 0.43        |
| DMN_OrbitalInferiorFrontal(R) | DMN_Precuneus(L)             | 0.52        | 0.60        |
| DMN_OrbitalInferiorFrontal(R) | DMN_PosteriorCingulate(L)    | 0.29        | 0.79        |



| Seed                         | Target                  | Sensitivity | Specificity |
|------------------------------|-------------------------|-------------|-------------|
| DMN_PosteriorCingulate(L)    | ECN_Striatum(R)         | 0.34        | 0.74        |
| DMN_MiddleFrontal(R)         | LN_Amygdala(L)          | 0.91        | 0.15        |
| DMN_InferiorOrbitofrontal(L) | LN_Striatum(R)          | 0.99        | 0.09        |
| DMN_Precuneus(L)             | SMN_Precentral(L)       | 0.26        | 0.83        |
| DMN_Striatum(R)              | Thalamus(L)             | 0.39        | 0.68        |
| DMN_Precuenus(R)             | VN_MiddleTemporal(L)    | 0.60        | 0.48        |
| DMN_InferiorOrbitofrontal(L) | VN_Fusiform(R)          | 0.91        | 0.11        |
| DMN_InferiorOrbitofrontal(L) | VN_Fusiform(L)          | 0.63        | 0.49        |
| ECN_MiddleCingulate(L)       | ECN_MiddleFrontal(R)    | 0.26        | 0.78        |
| ECN_InferiorFrontal(R)       | ECN_MiddleCingulate(L)  | 0.29        | 0.81        |
| ECN_Precuenus(L)             | LN_Striatum(R)          | 0.99        | 0.09        |
| ECN_Precuneus(R)             | SN_Striatum(R)          | 0.30        | 0.76        |
| ECN_Precuenus(L)             | SN_Striatum(R)          | 0.30        | 0.76        |
| ECN_MiddleCingulate(R)       | SN_Striatum(L)          | 0.14        | 0.90        |
| LN_Striatum(L)               | SMN_SuperiorTemporal(L) | 0.76        | 0.38        |
| LN_Striatum(R)               | SMN_Precentral(L)       | 0.26        | 0.83        |
| LN_Striatum(R)               | SMN_SuperiorTemporal(L) | 0.76        | 0.38        |
| LN_Striatum(R)               | SMN_Postcentral(R)      | 0.56        | 0.59        |
| Amygdala(L)                  | VN_Lingual(L)           | 0.08        | 0.97        |
| LN_Striatum(R)               | VN_Calcarine(R)         | 0.33        | 0.69        |
| LN_Striatum(R)               | VN_Lingual(R)           | 0.49        | 0.60        |
| LN_Striatum(R)               | VN_Calcarine(L)         | 0.57        | 0.50        |
| SMN_Precentral(R)            | SN_AnteriorCingulate(L) | 0.33        | 0.78        |
| SMN_Striatum(R)              | SN_MiddleCingulate(R)   | 0.51        | 0.55        |
| SMN_Striatum(R)              | VN_Calcarine(L)         | 0.39        | 0.69        |

| Seed                         | Target                       | Sensitivity | Specificity |
|------------------------------|------------------------------|-------------|-------------|
| SN_MiddleCingulate(L)        | SN_SupplementaryMotorArea(R) | 0.61        | 0.47        |
| SN_PosteriorInsula (L)       | Thalamus(L)                  | 0.39        | 0.68        |
| SN_Insula(R)                 | Thalamus(L)                  | 0.39        | 0.68        |
| Thalamus(L)                  | VN_Lingual(R)                | 0.49        | 0.60        |
| Thalamus(L)                  | VN_Calcarine(L)              | 0.57        | 0.50        |
| SN_Striatum(R)               | VN_SuperiorOccipital(L)      | 0.51        | 0.56        |
| Hippocampus_RA(R)            | SN_AnteriorInsula (L)        | 0.67        | 0.36        |
| ECN_Precuenus(L)             | ECN_Striatum(LR)             | 0.34        | 0.74        |
| DMN_Striatum(R)              | ECN_Precuenus(L)             | 0.08        | 0.94        |
| DAN_PostCentral(L)           | DMN_MiddleTemporal(L)        | 0.59        | 0.54        |
| SMN_Striatum(R)              | SN_MiddleCingulate(L)        | 0.17        | 0.90        |
| DMN_MiddleTemporal(L)        | SMN_Precentral(L)            | 0.26        | 0.83        |
| DMN_InferiorFrontal(R)       | ECN_MiddleCingulate(L)       | 0.29        | 0.81        |
| DMN_MiddleTemporal(L)        | SN_SupplementaryMotorArea(L) | 0.64        | 0.48        |
| DMN_MiddleTemporal(L)        | SN_MiddleFrontal(L)          | 0.34        | 0.75        |
| VN_Calcarine(R)              | VN_Cuneus(R)                 | 0.96        | 0.08        |
| ECN_Angular(R)               | SMN_SuperiorTemporal(L)      | 0.76        | 0.38        |
| DMN_InferiorOrbitofrontal(L) | SN_Striatum(L)               | 0.14        | 0.90        |
| SN_Striatum(L)               | SN_Supramarginal(R)          | 0.82        | 0.24        |
| Hippocampus_LA(L)            | VN_SuperiorOccipital(L)      | 0.51        | 0.56        |
| DMN_Striatum(R)              | LN_TemporalPole(R)           | 0.41        | 0.68        |
| ECN_OrbitalMiddleFrontal(R)  | SMN_SuperiorTemporal(R)      | 0.36        | 0.76        |
| SMN_RolandicOperculum(R)     | SN_Striatum(L)               | 0.14        | 0.90        |
| LN_InferiorTemporal(L)       | SMN_Insula (L)               | 0.57        | 0.58        |
| Hippocampus_LC(L)            | Thalamus(L)                  | 0.39        | 0.68        |

| Seed                         | Target                      | Sensitivity | Specificity |
|------------------------------|-----------------------------|-------------|-------------|
| DMN_SuperiorTemporal(R)      | ECN_OrbitalMiddleFrontal(R) | 0.19        | 0.83        |
| Hippocampus_LA(L)            | VN_Cuneus(L)                | 0.93        | 0.10        |
| ECN_Supramarginal(R)         | SN_Striatum(L)              | 0.14        | 0.90        |
| DMN_InferiorOrbitofrontal(L) | ECN_MiddleFrontal(R)        | 1.00        | 0.04        |
| DAN_SuperiorParietal(L)      | Hippocampus_RC(R)           | 0.24        | 0.84        |
| ECN_OrbitalMiddleFrontal(R)  | SMN_SuperiorTemporal(L)     | 0.76        | 0.38        |
| Amygdala(R)                  | SN_Supramarginal (L)        | 0.92        | 0.13        |
| LN_InferiorTemporal(L)       | SMN_SuperiorTemporal(L)     | 0.76        | 0.38        |
| DAN_Striatum(L)              | ECN_Angular(R)              | 0.31        | 0.76        |
| ECN_OrbitalMiddleFrontal(R)  | SN_SuperiorTemporal(R)      | 0.66        | 0.51        |
| DAN_Striatum(L)              | DMN_InferiorTemporal(R)     | 0.58        | 0.54        |
| Hippocampus_LA(L)            | VN_Calcarine(R)             | 0.33        | 0.69        |
| Hippocampus_LA(L)            | VN_Lingual(R)               | 0.49        | 0.60        |
| DAN_SuperiorParietal(L)      | Hippocampus_LA(L)           | 0.84        | 0.27        |
| DAN_Striatum(L)              | LN_TemporalPole(R)          | 0.41        | 0.68        |
| ECN_Precuneus(R)             | Hippocampus_LA(L)           | 0.84        | 0.27        |
| LN_InferiorTemporal(L)       | SMN_SuperiorTemporal(R)     | 0.36        | 0.76        |

**TABLE S9.** Moderators' level of functional connectivity driven by predictions only in sertraline (remission, non remission and more than 25% improvement, and non remission and less than 25% improvement) compared to healthy controls.

| Seed                         | Target                        | Z Score - Sertraline |                                  |                                      | Z Score- Placebo |                                  |                                      |
|------------------------------|-------------------------------|----------------------|----------------------------------|--------------------------------------|------------------|----------------------------------|--------------------------------------|
|                              |                               | Remission vs. HC     | Non Remission and Improve vs. HC | Non Remission and Not Improve vs. HC | Remission vs. HC | Non Remission and Improve vs. HC | Non Remission and Not Improve vs. HC |
| DAN_Precuneus(L)             | DMN_InferiorTemporal(L)       | -0.33                | -0.09                            | -0.69                                | -0.50            | -0.06                            | -0.64                                |
| DAN_Precuneus(L)             | ECN_Striatum(R)               | 0.01                 | -0.17                            | 0.09                                 | -0.04            | 0.07                             | -0.16                                |
| DMN_InferiorTemporal(R)      | DMN_MiddleFrontal(L)          | 0.09                 | 0.08                             | -0.04                                | 0.07             | 0.04                             | -0.02                                |
| DMN_InferiorFrontal(R)       | DMN_SuperiorMedialFrontal(L)  | -0.34                | -0.22                            | -0.16                                | -0.40            | -0.21                            | -0.20                                |
| DMN_Angularl(L)              | DMN_InferiorFrontal(L)        | 0.31                 | 0.09                             | -0.06                                | 0.04             | 0.10                             | 0.22                                 |
| DMN_MiddleFrontal(L)         | DMN_OrbitalInferiorFrontal(R) | 0.06                 | -0.17                            | 0.08                                 | 0.04             | -0.01                            | -0.07                                |
| DMN_Angularl(L)              | DMN_OrbitalInferiorFrontal(R) | 0.04                 | -0.12                            | 0.01                                 | -0.22            | 0.14                             | -0.05                                |
| DMN_MedialOrbitofrontal(L)   | DMN_MiddleFrontal(R)          | 0.03                 | 0.06                             | 0.07                                 | -0.01            | -0.09                            | 0.26                                 |
| DMN_Angular(R)               | DMN_Angularl(L)               | 0.00                 | -0.06                            | -0.27                                | -0.08            | 0.02                             | -0.30                                |
| DMN_InferiorOrbitofrontal(L) | DMN_Precuneus(R)              | 0.15                 | 0.00                             | 0.04                                 | 0.04             | 0.05                             | 0.08                                 |
| DMN_MiddleTemporal(R)        | DMN_Precuneus(L)              | -0.02                | -0.01                            | -0.05                                | -0.10            | 0.09                             | -0.13                                |
| DMN_InferiorFrontal(R)       | DMN_PosteriorCingulate(L)     | -0.19                | -0.24                            | -0.34                                | -0.36            | -0.18                            | -0.25                                |
| DMN_MiddleFrontal(R)         | DMN_PosteriorCingulate(L)     | -0.11                | 0.08                             | -0.26                                | -0.06            | -0.11                            | -0.14                                |
| DMN_InferiorOrbitofrontal(L) | DMN_Precuneus(L)              | 0.16                 | 0.05                             | 0.13                                 | 0.03             | 0.16                             | 0.13                                 |
| DMN_MiddleFrontal(L)         | DMN_SuperiorTemporal(R)       | 0.21                 | 0.09                             | 0.10                                 | 0.15             | 0.18                             | 0.02                                 |
| DMN_MiddleFrontal(L)         | DMN_PosteriorCingulate(L)     | -0.09                | 0.11                             | -0.06                                | -0.09            | -0.06                            | 0.12                                 |

| Seed                        | Target                      | Z Score - Sertraline |                                  |                                      | Z Score- Placebo |                                  |                                      |
|-----------------------------|-----------------------------|----------------------|----------------------------------|--------------------------------------|------------------|----------------------------------|--------------------------------------|
|                             |                             | Remission vs. HC     | Non Remission and Improve vs. HC | Non Remission and Not Improve vs. HC | Remission vs. HC | Non Remission and Improve vs. HC | Non Remission and Not Improve vs. HC |
| DMN_MiddleFrontal(L)        | ECN_Striatum(R)             | -0.17                | -0.14                            | -0.04                                | -0.33            | 0.01                             | -0.04                                |
| DMN_PosteriorCingulate(L)   | LN_TemporalPole(R)          | -0.22                | -0.09                            | -0.07                                | -0.18            | 0.04                             | -0.35                                |
| DMN_MiddleFrontal(R)        | Amygdala(R)                 | -0.09                | 0.00                             | -0.01                                | -0.28            | -0.01                            | 0.16                                 |
| DMN_Precuneus(L)            | SN_Striatum(L)              | -0.12                | 0.09                             | -0.09                                | -0.13            | 0.03                             | -0.06                                |
| ECN_InferiorParietal(L)     | ECN_OrbitalMiddleFrontal(R) | 0.11                 | -0.02                            | -0.29                                | -0.12            | 0.06                             | -0.15                                |
| ECN_Precuneus(R)            | VN_Calcarine(L)             | 0.00                 | -0.19                            | 0.03                                 | -0.30            | 0.20                             | -0.19                                |
| Hippocampus_LC(L)           | Amygdala(L)                 | 0.02                 | 0.19                             | -0.12                                | -0.09            | 0.08                             | 0.12                                 |
| Hippocampus_RA(R)           | SMN_Paracentral(L)          | 0.29                 | 0.13                             | -0.19                                | 0.04             | -0.18                            | 0.50                                 |
| LN_InferiorTemporal(L)      | DAN_SuperiorParietal(R)     | 0.18                 | -0.18                            | -0.21                                | -0.09            | 0.08                             | -0.20                                |
| LN_Striatum(R)              | VN_MiddleOccipital(R)       | 0.40                 | 0.10                             | 0.28                                 | 0.52             | 0.17                             | 0.11                                 |
| SMN_Paracentral(L)          | SN_SuperiorTemporal(R)      | -0.10                | -0.04                            | -0.03                                | -0.10            | -0.05                            | 0.00                                 |
| SMN_SuperiorTemporal(L)     | SN_AnteriorInsula (L)       | -0.64                | -0.05                            | -0.19                                | -0.37            | -0.28                            | -0.23                                |
| VN_Fusiform(R)              | VN_Fusiform(R)              | 0.02                 | 0.21                             | 0.12                                 | 0.14             | 0.12                             | 0.01                                 |
| DMN_InferiorFrontal(L)      | SMN_Striatum(L)             | -0.11                | -0.20                            | 0.06                                 | -0.04            | -0.07                            | -0.15                                |
| Hippocampus_RA(R)           | VN_SuperiorOccipital(L)     | -0.45                | -0.51                            | -0.19                                | -0.40            | -0.28                            | -0.50                                |
| DMN_Striatum(L)             | LN_TemporalPole(R)          | -0.05                | -0.17                            | 0.13                                 | 0.03             | -0.04                            | -0.05                                |
| LN_TemporalPole(R)          | Thalamus(R)                 | 0.25                 | 0.00                             | 0.49                                 | 0.39             | 0.29                             | 0.04                                 |
| SMN_Postcentral(R)          | SN_Striatum(L)              | 0.00                 | -0.03                            | 0.03                                 | 0.12             | -0.15                            | 0.03                                 |
| ECN_OrbitalMiddleFrontal(R) | SN_Striatum(R)              | 0.05                 | -0.12                            | 0.25                                 | -0.12            | 0.21                             | -0.01                                |
| DMN_InferiorFrontal(L)      | SN_Striatum(L)              | 0.17                 | -0.15                            | 0.06                                 | 0.08             | 0.00                             | -0.08                                |

None of the comparisons were significant at FDR  $p < 0.05$ .

**TABLE S10.** Moderators' level of functional connectivity driven by predictions only in placebo (remission, non remission and more than 25% improvement, and non remission and less than 25% improvement) compared to healthy controls.

| Seed                         | Target                      | Z Score - Sertraline |                                  |                                      | Z Score- Placebo |                                  |                                      |
|------------------------------|-----------------------------|----------------------|----------------------------------|--------------------------------------|------------------|----------------------------------|--------------------------------------|
|                              |                             | Remission vs. HC     | Non Remission and Improve vs. HC | Non Remission and Not Improve vs. HC | Remission vs. HC | Non Remission and Improve vs. HC | Non Remission and Not Improve vs. HC |
| DAN_Striatum(R)              | ECN_Striatum(L)             | 0.04                 | 0.17                             | 0.02                                 | 0.18             | 0.15                             | -0.08                                |
| DAN_SuperiorParietal(L)      | Hippocampus_RA(R)           | -0.34                | -0.29                            | -0.18                                | -0.31            | -0.20                            | -0.30                                |
| DAN_Striatum(R)              | Amygdala(L)                 | 0.12                 | 0.23                             | 0.37                                 | 0.35             | 0.17                             | 0.16                                 |
| DAN_Striatum(R)              | SN_Striatum(L)              | 0.13                 | 0.23                             | 0.19                                 | 0.16             | 0.25                             | 0.06                                 |
| DMN_Precuneus(L)             | DAN_Precuneus(R)            | 0.09                 | 0.15                             | 0.02                                 | 0.09             | 0.17                             | -0.06                                |
| DMN_InferiorOrbitofrontal(L) | ECN_OrbitalMiddleFrontal(R) | 0.30                 | -0.35                            | 0.17                                 | -0.18            | 0.25                             | -0.05                                |
| DMN_MiddleFrontal(L)         | LN_Striatum(L)              | -0.35                | -0.18                            | -0.14                                | -0.35            | -0.16                            | -0.13                                |
| DMN_MiddleTemporal(L)        | LN_InferiorTemporal(L)      | -0.12                | -0.27                            | -0.06                                | -0.31            | 0.02                             | -0.26                                |
| DMN_MiddleFrontal(L)         | SMN_SuperiorTemporal(L)     | 0.12                 | -0.43                            | -0.25                                | -0.13            | -0.24                            | -0.13                                |
| DMN_MiddleFrontal(L)         | SMN_SuperiorTemporal(R)     | 0.03                 | -0.41                            | -0.28                                | -0.17            | -0.24                            | -0.18                                |
| DMN_InferiorTemporal(R)      | SMN_SuperiorTemporal(L)     | -0.17                | -0.26                            | -0.25                                | -0.12            | -0.26                            | -0.28                                |
| DMN_AnteriorCingulate(R)     | SN_SuperiorTemporal(R)      | 0.08                 | -0.26                            | -0.30                                | 0.04             | -0.13                            | -0.42                                |
| DMN_InferiorTemporal(R)      | SN_SuperiorTemporal(R)      | -0.09                | -0.12                            | -0.25                                | -0.05            | -0.18                            | -0.20                                |
| ECN_Striatum(L)              | DAN_MiddleTemporal(R)       | -0.24                | -0.13                            | -0.01                                | -0.18            | 0.05                             | -0.32                                |
| ECN_Striatum(L)              | DAN_Postcentral(R)          | 0.15                 | 0.07                             | 0.18                                 | 0.22             | 0.09                             | 0.06                                 |
| ECN_Precuneus(R)             | Hippocampus_LC(L)           | -0.06                | -0.36                            | 0.06                                 | -0.10            | -0.07                            | -0.18                                |
| ECN_Precuneus(L)             | Hippocampus_RC(R)           | -0.03                | -0.02                            | -0.09                                | 0.02             | -0.06                            | -0.15                                |
| ECN_MiddleCingulate(R)       | Hippocampus_LA(L)           | -0.08                | -0.21                            | -0.35                                | -0.21            | -0.39                            | 0.05                                 |
| ECN_MiddleCingulate(R)       | Hippocampus_RC(R)           | -0.04                | -0.18                            | -0.23                                | -0.10            | -0.03                            | -0.36                                |
| ECN_Precuneus(R)             | Hippocampus_RC(R)           | 0.10                 | 0.05                             | 0.06                                 | 0.20             | 0.11                             | -0.16                                |
| ECN_Striatum(R)              | LN_TemporalPole(R)          | -0.01                | -0.24                            | -0.10                                | -0.07            | -0.03                            | -0.22                                |
| ECN_Striatum(R)              | SN_Supramarginal (L)        | 0.08                 | -0.10                            | -0.26                                | 0.07             | -0.03                            | -0.39                                |

| Seed                          | Target                       | Z Score - Sertraline |                                  |                                      | Z Score- Placebo |                                  |                                      |
|-------------------------------|------------------------------|----------------------|----------------------------------|--------------------------------------|------------------|----------------------------------|--------------------------------------|
|                               |                              | Remission vs. HC     | Non Remission and Improve vs. HC | Non Remission and Not Improve vs. HC | Remission vs. HC | Non Remission and Improve vs. HC | Non Remission and Not Improve vs. HC |
| ECN_MiddleFrontal(R)          | SN_MiddleFrontal(L)          | -0.09                | -0.24                            | -0.30                                | -0.22            | -0.14                            | -0.27                                |
| ECN_Striatum(L)               | SN_SupplementaryMotorArea(R) | -0.19                | -0.19                            | -0.17                                | -0.24            | -0.09                            | -0.23                                |
| ECN_OrbitalMiddleFrontal(R)   | VN_InferiorOccipital(R)      | 0.16                 | -0.08                            | 0.06                                 | -0.11            | 0.22                             | -0.05                                |
| ECN_Supramarginal(R)          | VN_InferiorOccipital(R)      | -0.05                | -0.10                            | 0.18                                 | -0.01            | 0.10                             | -0.17                                |
| SN_PosteriorInsula (L)        | VN_Lingual(L)                | 0.00                 | -0.07                            | -0.19                                | -0.19            | 0.00                             | -0.11                                |
| DAN_Superior Frontal (L)      | DMN_MiddleTemporal(L)        | -0.12                | 0.28                             | 0.06                                 | 0.20             | -0.05                            | 0.12                                 |
| DAN_InferiorFrontal(R)        | ECN_MiddleCingulate(R)       | 0.19                 | 0.08                             | 0.09                                 | 0.32             | 0.03                             | 0.06                                 |
| DAN_InferiorFrontal(R)        | ECN_MiddleCingulate(L)       | -0.04                | -0.05                            | -0.03                                | 0.13             | -0.02                            | -0.24                                |
| DAN_SuperiorParietal(L)       | ECN_Striatum(R)              | 0.23                 | 0.25                             | 0.38                                 | 0.29             | 0.34                             | 0.22                                 |
| DAN_Striatum(R)               | SMN_Precentral(L)            | 0.13                 | 0.51                             | 0.61                                 | 0.27             | 0.34                             | 0.53                                 |
| DAN_InferiorFrontal(R)        | SN_MiddleCingulate(L)        | -0.13                | -0.14                            | -0.20                                | -0.09            | -0.04                            | -0.31                                |
| DAN_MiddleTemporal(R)         | SN_MiddleFrontal(L)          | -0.13                | -0.27                            | -0.25                                | -0.29            | -0.26                            | -0.13                                |
| DMN_MiddleFrontal(L)          | DMN_PosteriorCingulate(L)    | -0.09                | 0.11                             | -0.06                                | -0.09            | -0.06                            | 0.12                                 |
| DMN_MiddleFrontal(L)          | DMN_SuperiorTemporal(R)      | 0.21                 | 0.09                             | 0.10                                 | 0.15             | 0.18                             | 0.02                                 |
| DMN_OrbitalInferiorFrontal(R) | DMN_Precuneus(L)             | 0.15                 | -0.03                            | 0.13                                 | -0.01            | 0.17                             | 0.06                                 |
| DMN_OrbitalInferiorFrontal(R) | DMN_PosteriorCingulate(L)    | 0.02                 | -0.04                            | -0.09                                | -0.16            | 0.06                             | -0.02                                |
| DMN_PosteriorCingulate(L)     | ECN_Striatum(R)              | -0.33                | -0.29                            | -0.37                                | -0.48            | -0.38                            | -0.13                                |
| DMN_MiddleFrontal(R)          | Amygdala(R)                  | -0.09                | 0.00                             | -0.01                                | -0.28            | -0.01                            | 0.16                                 |
| DMN_InferiorOrbitofrontal(L)  | LN_Striatum(R)               | -0.07                | -0.23                            | -0.15                                | -0.25            | -0.08                            | -0.09                                |
| DMN_Precuneus(L)              | SMN_Precentral(L)            | -0.11                | 0.06                             | -0.22                                | -0.16            | -0.14                            | 0.01                                 |
| DMN_Striatum(R)               | Thalamus(L)                  | 0.21                 | 0.28                             | 0.41                                 | 0.44             | 0.11                             | 0.37                                 |
| DMN_Precuneus(R)              | VN_MiddleTemporal(L)         | 0.10                 | 0.44                             | 0.09                                 | 0.16             | 0.41                             | -0.02                                |
| DMN_InferiorOrbitofrontal(L)  | VN_Fusiform(R)               | -0.10                | -0.15                            | -0.31                                | -0.09            | -0.15                            | -0.31                                |
| DMN_InferiorOrbitofrontal(L)  | VN_Fusiform(L)               | 0.09                 | -0.12                            | 0.11                                 | 0.05             | -0.01                            | 0.01                                 |

| Seed                   | Target                       | Z Score - Sertraline |                                  |                                      | Z Score- Placebo |                                  |                                      |
|------------------------|------------------------------|----------------------|----------------------------------|--------------------------------------|------------------|----------------------------------|--------------------------------------|
|                        |                              | Remission vs. HC     | Non Remission and Improve vs. HC | Non Remission and Not Improve vs. HC | Remission vs. HC | Non Remission and Improve vs. HC | Non Remission and Not Improve vs. HC |
| ECN_MiddleCingulate(L) | ECN_MiddleFrontal(R)         | -0.10                | -0.20                            | 0.11                                 | -0.02            | 0.04                             | -0.25                                |
| ECN_InferiorFrontal(R) | ECN_MiddleCingulate(L)       | -0.12                | -0.39                            | -0.12                                | 0.03             | -0.30                            | -0.39                                |
| ECN_Precuenus(L)       | LN_Striatum(R)               | -0.22                | 0.04                             | 0.17                                 | 0.12             | 0.08                             | -0.35                                |
| ECN_Precuneus(R)       | SN_Striatum(R)               | 0.27                 | 0.26                             | 0.67                                 | 0.43             | 0.70                             | -0.06                                |
| ECN_Precuneus(L)       | SN_Striatum(R)               | 0.12                 | 0.31                             | 0.38                                 | 0.21             | 0.67                             | -0.20                                |
| ECN_MiddleCingulate(R) | SN_Striatum(L)               | -0.45                | -0.01                            | -0.13                                | -0.17            | -0.14                            | -0.28                                |
| LN_Striatum(L)         | SMN_SuperiorTemporal(L)      | 0.16                 | -0.14                            | -0.13                                | -0.11            | 0.10                             | -0.07                                |
| LN_Striatum(R)         | SMN_Precentral(L)            | 0.17                 | 0.38                             | 0.12                                 | 0.16             | 0.16                             | 0.42                                 |
| LN_Striatum(R)         | SMN_SuperiorTemporal(L)      | -0.08                | -0.23                            | -0.35                                | -0.06            | -0.24                            | -0.27                                |
| LN_Striatum(R)         | SMN_Postcentral(R)           | -0.02                | 0.19                             | -0.01                                | 0.09             | -0.08                            | 0.29                                 |
| Amygdala(L)            | VN_Lingual(L)                | -0.02                | -0.05                            | -0.09                                | -0.01            | -0.08                            | -0.04                                |
| LN_Striatum(R)         | VN_Calcarine(R)              | 0.09                 | -0.03                            | 0.22                                 | 0.12             | 0.15                             | -0.07                                |
| LN_Striatum(R)         | VN_Lingual(R)                | -0.12                | -0.08                            | 0.20                                 | 0.17             | 0.01                             | -0.27                                |
| LN_Striatum(R)         | VN_Calcarine(L)              | -0.18                | -0.12                            | 0.20                                 | 0.02             | 0.04                             | -0.29                                |
| SMN_Precentral(R)      | SN_AnteriorCingulate(L)      | -0.22                | -0.17                            | -0.18                                | -0.27            | -0.33                            | 0.02                                 |
| SMN_Striatum(R)        | SN_MiddleCingulate(R)        | 0.00                 | 0.20                             | -0.07                                | 0.18             | 0.13                             | -0.19                                |
| SMN_Striatum(R)        | VN_Calcarine(L)              | 0.29                 | 0.05                             | -0.05                                | 0.24             | 0.00                             | 0.19                                 |
| SN_MiddleCingulate(L)  | SN_SupplementaryMotorArea(R) | -0.37                | -0.24                            | -0.38                                | -0.44            | -0.24                            | -0.31                                |
| SN_PosteriorInsula (L) | Thalamus(L)                  | 0.17                 | -0.03                            | 0.20                                 | 0.10             | 0.21                             | 0.01                                 |
| SN_Insula(R)           | Thalamus(L)                  | 0.14                 | 0.09                             | 0.19                                 | 0.09             | 0.23                             | 0.10                                 |
| Thalamus(L)            | VN_Lingual(R)                | 0.17                 | 0.07                             | 0.25                                 | 0.20             | 0.38                             | -0.16                                |
| Thalamus(L)            | VN_Calcarine(L)              | 0.04                 | -0.11                            | 0.09                                 | 0.05             | 0.19                             | -0.30                                |

None of the comparisons were significant at FDR  $p < 0.05$ .



**TABLE S11.** Moderators' level of functional connectivity driven by predictions in both sertraline and placebo (remission, non remission and more than 25% improvement, and non remission and less than 25% improvement) compared to healthy controls.

| Seed                         | Target                       | Z Score - Sertraline |                                  |                                      | Z Score- Placebo |                                  |                                      |
|------------------------------|------------------------------|----------------------|----------------------------------|--------------------------------------|------------------|----------------------------------|--------------------------------------|
|                              |                              | Remission vs. HC     | Non Remission and Improve vs. HC | Non Remission and Not Improve vs. HC | Remission vs. HC | Non Remission and Improve vs. HC | Non Remission and Not Improve vs. HC |
| SN_Striatum(L)               | VN_SuperiorOccipital(L)      | 0.24                 | 0.36                             | 0.21                                 | 0.35             | 0.32                             | 0.12                                 |
| Hippocampus_RA(R)            | SN_AnteriorInsula (L)        | -0.07                | 0.14                             | 0.06                                 | 0.00             | 0.03                             | 0.12                                 |
| ECN_Precueus(L)              | ECN_Striatum(R)              | -0.17                | 0.05                             | -0.11                                | -0.01            | -0.05                            | -0.20                                |
| DMN_Striatum(R)              | ECN_Precueus(L)              | -0.06                | 0.07                             | 0.02                                 | 0.08             | 0.03                             | -0.11                                |
| DAN_PostCentral(L)           | DMN_MiddleTemporal(L)        | -0.41                | -0.03                            | -0.35                                | -0.30            | -0.29                            | -0.24                                |
| SMN_Striatum(R)              | SN_MiddleCingulate(L)        | 0.11                 | 0.18                             | -0.12                                | 0.06             | 0.26                             | -0.16                                |
| DMN_MiddleTemporal(L)        | SMN_Precentral(L)            | -0.11                | 0.21                             | -0.16                                | -0.11            | -0.01                            | 0.08                                 |
| DMN_InferiorFrontal(R)       | ECN_MiddleCingulate(L)       | -0.15                | -0.38                            | -0.12                                | -0.28            | -0.13                            | -0.28                                |
| DMN_MiddleTemporal(L)        | SN_SupplementaryMotorArea(L) | -0.22                | 0.17                             | -0.20                                | -0.02            | -0.15                            | -0.03                                |
| DMN_MiddleTemporal(L)        | SN_MiddleFrontal(L)          | -0.16                | -0.05                            | -0.32                                | -0.36            | -0.13                            | -0.07                                |
| VN_Calcarine(R)              | VN_Cuneus(R)                 | 0.09                 | 0.17                             | 0.28                                 | 0.07             | 0.21                             | 0.19                                 |
| ECN_Angular(R)               | SMN_SuperiorTemporal(L)      | -0.06                | -0.24                            | 0.11                                 | 0.25             | 0.01                             | -0.52                                |
| DMN_InferiorOrbitofrontal(L) | SN_Striatum(L)               | -0.22                | -0.14                            | 0.02                                 | -0.02            | -0.09                            | -0.28                                |
| SN_Striatum(L)               | SN_Supramarginal(R)          | 0.12                 | 0.12                             | 0.24                                 | 0.14             | 0.23                             | 0.01                                 |
| Hippocampus_LA(L)            | VN_SuperiorOccipital(L)      | -0.10                | -0.32                            | -0.16                                | -0.31            | -0.05                            | -0.23                                |
| DMN_Striatum(R)              | LN_TemporalPole(R)           | 0.09                 | -0.23                            | 0.44                                 | -0.01            | 0.24                             | 0.07                                 |
| ECN_OrbitalMiddleFrontal(R)  | SMN_SuperiorTemporal(R)      | 0.10                 | -0.30                            | -0.07                                | 0.09             | -0.13                            | -0.25                                |
| SMN_RolandicOperculum(R)     | SN_Striatum(R)               | 0.22                 | 0.06                             | 0.18                                 | 0.14             | 0.14                             | 0.13                                 |
| LN_InferiorTemporal(L)       | SMN_Insula (L)               | 0.12                 | -0.08                            | 0.07                                 | 0.20             | -0.02                            | 0.02                                 |
| Hippocampus_LC(L)            | Thalamus(L)                  | 0.75                 | 0.36                             | 0.62                                 | 0.43             | 0.68                             | 0.51                                 |
| DMN_SuperiorTemporal(R)      | ECN_OrbitalMiddleFrontal(R)  | -0.02                | -0.31                            | -0.01                                | -0.11            | 0.02                             | -0.34                                |
| Hippocampus_LA(L)            | VN_Cuneus(L)                 | -0.02                | -0.36                            | -0.10                                | -0.23            | -0.05                            | -0.18                                |

| Seed                         | Target                  | Z Score - Sertraline |                                  |                                      | Z Score- Placebo |                                  |                                      |
|------------------------------|-------------------------|----------------------|----------------------------------|--------------------------------------|------------------|----------------------------------|--------------------------------------|
|                              |                         | Remission vs. HC     | Non Remission and Improve vs. HC | Non Remission and Not Improve vs. HC | Remission vs. HC | Non Remission and Improve vs. HC | Non Remission and Not Improve vs. HC |
| ECN_Supramarginal(R)         | SN_Striatum(R)          | 0.28                 | 0.24                             | 0.36                                 | 0.17             | 0.55                             | 0.09                                 |
| DMN_InferiorOrbitofrontal(L) | ECN_MiddleFrontal(R)    | 0.03                 | -0.04                            | 0.26                                 | -0.11            | 0.12                             | 0.16                                 |
| DAN_SuperiorParietal(L)      | Hippocampus_RC(R)       | -0.08                | -0.25                            | -0.47                                | -0.30            | -0.22                            | -0.30                                |
| ECN_OrbitalMiddleFrontal(R)  | SMN_SuperiorTemporal(L) | 0.15                 | -0.20                            | -0.04                                | 0.13             | -0.06                            | -0.14                                |
| Amygdala(R)                  | SN_Supramarginal (L)    | 0.16                 | 0.11                             | 0.30                                 | 0.17             | 0.18                             | 0.23                                 |
| LN_InferiorTemporal(L)       | SMN_SuperiorTemporal(L) | -0.09                | -0.40                            | -0.10                                | 0.07             | -0.21                            | -0.47                                |
| DAN_Striatum(L)              | ECN_Angular(R)          | -0.07                | -0.01                            | 0.15                                 | -0.15            | 0.03                             | 0.16                                 |
| ECN_OrbitalMiddleFrontal(R)  | SN_SuperiorTemporal(R)  | -0.18                | -0.17                            | -0.31                                | -0.26            | -0.11                            | -0.37                                |
| DAN_Striatum(L)              | DMN_InferiorTemporal(R) | -0.12                | 0.23                             | 0.10                                 | -0.27            | 0.08                             | 0.38                                 |
| Hippocampus_LA(L)            | VN_Calcarine(R)         | 0.03                 | -0.09                            | 0.07                                 | 0.03             | -0.02                            | 0.07                                 |
| Hippocampus_LA(L)            | VN_Lingual(R)           | 0.12                 | -0.03                            | 0.03                                 | -0.04            | 0.09                             | 0.12                                 |
| DAN_SuperiorParietal(L)      | Hippocampus_LA(L)       | 0.13                 | 0.00                             | 0.10                                 | -0.02            | 0.30                             | -0.10                                |
| DAN_Striatum(L)              | LN_TemporalPole(R)      | -0.20                | -0.12                            | -0.16                                | -0.27            | -0.02                            | -0.25                                |
| ECN_Precuneus(R)             | Hippocampus_LA(L)       | 0.41                 | 0.16                             | 0.15                                 | 0.15             | 0.32                             | 0.26                                 |
| LN_InferiorTemporal(L)       | SMN_SuperiorTemporal(R) | -0.07                | -0.09                            | -0.04                                | 0.10             | -0.10                            | -0.26                                |

None of the comparisons were significant at FDR  $p < 0.05$ .

**TABLE S12.** Nonspecific Predictors

| Seed                          | Target                        | FDR p value | Regression Coefficient | Effect Size |
|-------------------------------|-------------------------------|-------------|------------------------|-------------|
| DAN_SuperiorParietal(L)       | SN_Striatum(R)                | <0.01       | -1.53                  | -0.25       |
| VN_Fusiform(L)                | VN_Striatum(R)                | <0.01       | -1.94                  | -0.24       |
| DMN_MiddleTemporal(L)         | VN_Calcarine(R)               | 0.03        | -2.33                  | -0.13       |
| DMN_InferiorOrbitofrontal(L)  | SN_MiddleCingulate(L)         | 0.03        | -1.86                  | -0.12       |
| SN_MiddleFrontal(L)           | SMN_Postcentral(R)            | 0.02        | -2.33                  | -0.12       |
| DMN_MiddleTemporal(L)         | DAN_SuperiorParietal(R)       | 0.00        | -1.81                  | -0.12       |
| VN_Lingual(L)                 | ECN_Precuneus(R)              | 0.04        | -2.57                  | -0.12       |
| DAN_PostCentral(L)            | DMN_OrbitalInferiorFrontal(R) | 0.04        | -1.72                  | -0.12       |
| DMN_SuperiorMedialFrontal(L)  | DMN_InferiorFrontal(R)        | 0.03        | -1.81                  | -0.12       |
| DMN_Angularl(L)               | DMN_PosteriorCingulate(R)     | 0.01        | -1.71                  | -0.12       |
| DMN_OrbitalInferiorFrontal(R) | Amygdala(R)                   | 0.04        | -2.07                  | -0.12       |
| SN_PosteriorInsula (L)        | Amygdala(L)                   | 0.03        | -1.74                  | -0.12       |
| DMN_InferiorTemporal(L)       | LN_SuperiorOrbitofrontal(R)   | 0.03        | -2.50                  | -0.11       |
| SMN_SuperiorTemporal(R)       | Amygdala(R)                   | 0.04        | -1.95                  | -0.11       |
| DMN_MiddleTemporal(L)         | VN_Calcarine(L)               | 0.03        | -2.27                  | -0.10       |
| ECN_Precuneus(R)              | VN_Lingual(R)                 | 0.03        | -2.29                  | -0.10       |
| DMN_MiddleFrontal(L)          | DMN_InferiorTemporal(R)       | <0.01       | -1.55                  | -0.10       |
| VN_Calcarine(R)               | Amygdala(R)                   | 0.01        | -1.60                  | -0.10       |
| DAN_InferiorTemporal(L)       | VN_Lingual(L)                 | 0.01        | -2.20                  | -0.09       |
| DAN_SuperiorParietal(R)       | VN_MiddleOccipital(R)         | 0.05        | -2.00                  | -0.09       |
| DMN_InferiorFrontal(R)        | DMN_InferiorTemporal(R)       | 0.01        | -1.49                  | -0.09       |
| DMN_SuperiorMedialFrontal(R)  | DMN_InferiorFrontal(R)        | <0.01       | -1.73                  | -0.09       |
| SN_MiddleFrontal(L)           | SMN_Striatum(R)               | 0.04        | -1.57                  | -0.09       |
| SN_PosteriorInsula (L)        | Amygdala(R)                   | 0.02        | -1.73                  | -0.09       |
| DMN_MiddleFrontal(L)          | DMN_InferiorTemporal(L)       | 0.05        | -1.27                  | -0.08       |
| DMN_MiddleTemporal(L)         | SMN_Precentral(R)             | 0.03        | -1.91                  | -0.08       |

| Seed                         | Target                      | FDR p value | Regression Coefficient | Effect Size |
|------------------------------|-----------------------------|-------------|------------------------|-------------|
| SN_AnteriorCingulate(L)      | SN_Insula(R)                | 0.02        | -1.58                  | -0.08       |
| DMN_Striatum(L)              | LN_Striatum(R)              | 0.05        | -1.87                  | -0.08       |
| ECN_Striatum®                | DMN_Striatum(R)             | 0.04        | -2.36                  | -0.08       |
| SN_PosteriorInsula (L)       | SN_AnteriorCingulate(L)     | 0.02        | -1.55                  | -0.07       |
| DMN_SuperiorMedialFrontal(L) | VN_Fusiform(R)              | 0.01        | -2.00                  | -0.07       |
| DMN_SuperiorMedialFrontal(R) | VN_Fusiform(R)              | 0.03        | -1.56                  | -0.07       |
| ECN_Precuenus(L)             | DAN_Postcentral(R)          | 0.01        | -1.51                  | -0.07       |
| DMN_MiddleFrontal(L)         | DAN_Precuneus(R)            | 0.03        | -1.56                  | -0.07       |
| ECN_InferiorFrontal(R)       | SN_Insula(R)                | <0.01       | -1.49                  | -0.07       |
| DMN_InferiorFrontal(L)       | DMN_Angular(L)              | 0.01        | -1.76                  | -0.07       |
| DMN_Striatum(R)              | ECN_Striatum(L)             | 0.03        | -1.82                  | -0.07       |
| SN_AnteriorCingulate(L)      | Thalamus(L)                 | 0.01        | -2.46                  | -0.07       |
| LN_OrbitalFrontal(L)         | VN_Lingual(L)               | 0.03        | -1.89                  | -0.06       |
| DMN_Angularl(L)              | ECN_Angular(R)              | 0.01        | -1.61                  | -0.06       |
| DMN_MiddleFrontal(L)         | ECN_OrbitalMiddleFrontal(R) | 0.01        | -1.89                  | -0.06       |
| DMN_MiddleFrontal(R)         | DMN_MiddleTemporal(R)       | 0.02        | -1.81                  | -0.06       |
| DMN_Angularl(L)              | DMN_InferiorFrontal(R)      | 0.03        | -1.55                  | -0.06       |
| DMN_InferiorOrbitofrontal(L) | Amygdala(R)                 | 0.03        | -2.14                  | -0.06       |
| DMN_MiddleTemporal(L)        | VN_MiddleTemporal(L)        | 0.05        | -1.50                  | -0.05       |
| DAN_SuperiorParietal(L)      | DAN_Precuneus(L)            | 0.02        | -2.44                  | -0.05       |
| DAN_Precuneus(L)             | VN_Fusiform(R)              | 0.03        | -2.28                  | -0.05       |
| DAN_InferiorParietal(L)      | VN_MiddleOccipital(R)       | 0.01        | -1.88                  | -0.05       |
| DMN_Angularl(L)              | DMN_InferiorTemporal(R)     | 0.01        | -1.63                  | -0.05       |
| DMN_MiddleFrontal(L)         | DMN_InferiorTemporal(R)     | 0.03        | -1.83                  | -0.05       |
| DMN_SuperiorMedialFrontal(L) | DMN_InferiorTemporal(R)     | 0.04        | -1.72                  | -0.05       |
| DMN_MiddleFrontal(L)         | DMN_InferiorFrontal(R)      | 0.02        | -1.21                  | -0.05       |
| DMN_PosteriorCingulate(L)    | DMN_Precuenus(R)            | 0.02        | -1.78                  | -0.05       |

| Seed                         | Target                       | FDR p value | Regression Coefficient | Effect Size |
|------------------------------|------------------------------|-------------|------------------------|-------------|
| VN_Lingual(L)                | Hippocampus_LC(L)            | 0.03        | -2.51                  | -0.05       |
| VN_MiddleOccipital(R)        | DAN_InferiorTemporal(L)      | 0.05        | -2.20                  | -0.04       |
| SMN_Postcentral(L)           | SN_MiddleCingulate(L)        | 0.03        | -2.07                  | -0.04       |
| SN_Insula(R)                 | VN_Lingual(R)                | 0.02        | -2.13                  | -0.04       |
| ECN_MiddleCingulate(R)       | DMN_InferiorTemporal(R)      | 0.04        | -1.53                  | -0.04       |
| DMN_Angularl(L)              | DMN_MiddleTemporal(R)        | 0.02        | -1.85                  | -0.04       |
| LN_InferiorTemporal(L)       | SMN_Striatum(L)              | 0.02        | -1.45                  | -0.04       |
| SMN_Striatum(R)              | SN_Striatum(L)               | 0.02        | -2.14                  | -0.04       |
| DAN_Precuneus(L)             | DMN_Striatum(L)              | 0.02        | -2.27                  | -0.04       |
| DMN_InferiorTemporal(R)      | Hippocampus_RC(R)            | 0.01        | -1.89                  | -0.04       |
| SMN_Striatum(R)              | Hippocampus_LA(L)            | 0.02        | -2.09                  | -0.04       |
| DAN_SuperiorFrontal(R)       | Thalamus(R)                  | 0.03        | -1.95                  | -0.04       |
| SN_PosteriorInsula (L)       | Thalamus(L)                  | 0.03        | -2.13                  | -0.04       |
| SN_Insula(R)                 | Thalamus(L)                  | 0.02        | -1.90                  | -0.04       |
| SMN_Striatum(R)              | SMN_SuperiorTemporal(L)      | 0.05        | -1.68                  | -0.03       |
| DMN_Angularl(L)              | SN_Supramarginal (L)         | 0.05        | -1.81                  | -0.03       |
| DMN_InferiorOrbitofrontal(L) | DMN_SuperiorMedialFrontal(L) | 0.02        | -1.50                  | -0.03       |
| DAN_InferiorParietal(L)      | VN_Fusiform(R)               | <0.01       | -1.93                  | -0.03       |
| DAN_Precuneus(L)             | VN_InferiorOccipital(R)      | 0.04        | -1.62                  | -0.03       |
| DMN_Angularl(L)              | VN_Lingual(R)                | 0.02        | -1.35                  | -0.03       |
| SMN_SuperiorTemporal(L)      | SMN_SuperiorTemporal(R)      | 0.02        | -1.70                  | -0.03       |
| DMN_SuperiorMedialFrontal(R) | SMN_Postcentral(R)           | 0.04        | -1.70                  | -0.03       |
| VN_MiddleTemporal(L)         | DAN_MiddleTemporal(R)        | 0.04        | -1.97                  | -0.03       |
| DAN_Precuneus(L)             | DAN_Precuneus(R)             | 0.05        | -1.84                  | -0.03       |
| SMN_Postcentral(L)           | SN_MiddleCingulate(R)        | <0.01       | -1.68                  | -0.03       |
| SN_Insula(R)                 | SN_SupplementaryMotorArea(R) | 0.02        | -1.76                  | -0.03       |
| DMN_MiddleFrontal(L)         | DMN_MiddleTemporal(R)        | 0.04        | -0.98                  | -0.03       |

| Seed                         | Target                        | FDR p value | Regression Coefficient | Effect Size |
|------------------------------|-------------------------------|-------------|------------------------|-------------|
| ECN_MiddleCingulate(L)       | DMN_AnteriorCingulate(R)      | <0.01       | -1.62                  | -0.03       |
| DMN_PosteriorCingulate(L)    | DMN_PosteriorCingulate(R)     | 0.02        | -1.89                  | -0.03       |
| DMN_Precuenus(R)             | DMN_PosteriorCingulate(R)     | 0.01        | -1.98                  | -0.03       |
| SN_MiddleFrontal(L)          | ECN_Striatum(R)               | <0.01       | -1.25                  | -0.03       |
| DAN_Superior Frontal (L)     | LN_Striatum(L)                | 0.02        | -1.69                  | -0.03       |
| SN_AnteriorInsula (L)        | Hippocampus_LA(L)             | 0.02        | -1.96                  | -0.03       |
| VN_Fusiform(R)               | Hippocampus_LC(L)             | <0.01       | -2.37                  | -0.03       |
| DAN_Precentral(L)            | Thalamus(R)                   | 0.03        | -1.79                  | -0.03       |
| DAN_InferiorParietal(L)      | VN_Lingual(L)                 | <0.01       | -1.83                  | -0.02       |
| ECN_InferiorParietal(L)      | DAN_SuperiorParietal(L)       | 0.01        | -1.91                  | -0.02       |
| DAN_Precuneus(L)             | DAN_SuperiorParietal(L)       | 0.03        | -1.96                  | -0.02       |
| SN_AnteriorInsula (L)        | SN_AnteriorCingulate(L)       | <0.01       | -1.53                  | -0.02       |
| ECN_InferiorParietal(L)      | ECN_InferiorFrontal(L)        | <0.01       | -2.18                  | -0.02       |
| VN_Fusiform(L)               | VN_Fusiform(R)                | <0.01       | -1.86                  | -0.02       |
| DMN_MiddleFrontal(L)         | VN_Lingual(R)                 | <0.010      | -1.54                  | -0.02       |
| SMN_Insula (L)               | SMN_Postcentral(R)            | 0.03        | -2.16                  | -0.02       |
| DMN_InferiorOrbitofrontal(L) | DAN_SuperiorParietal(R)       | 0.01        | -2.36                  | -0.02       |
| DAN_InferiorTemporal(L)      | ECN_InferiorFrontal(R)        | 0.02        | -1.67                  | -0.02       |
| ECN_Angular(R)               | DMN_InferiorTemporal(R)       | 0.05        | -1.60                  | -0.02       |
| ECN_Angular(R)               | DMN_MiddleTemporal(R)         | 0.05        | -1.78                  | -0.02       |
| ECN_MiddleFrontal(R)         | DMN_OrbitalInferiorFrontal(R) | 0.02        | -2.08                  | -0.02       |
| ECN_Striatum(R)              | SN_Striatum(L)                | 0.03        | -2.18                  | -0.02       |
| DMN_PosteriorCingulate(L)    | VN_Calcarine(L)               | <0.01       | -0.93                  | -0.01       |
| SMN_SuperiorTemporal(L)      | SMN_Postcentral(L)            | <0.01       | -1.84                  | -0.01       |
| DMN_InferiorTemporal(L)      | DMN_MiddleTemporal(L)         | <0.01       | -1.60                  | -0.01       |
| ECN_MiddleCingulate(L)       | DMN_Precuneus(L)              | 0.01        | -1.78                  | -0.01       |
| SMN_SuperiorTemporal(L)      | SMN_Insula(R)                 | 0.03        | -1.68                  | -0.01       |

| Seed                      | Target                       | FDR p value | Regression Coefficient | Effect Size |
|---------------------------|------------------------------|-------------|------------------------|-------------|
| ECN_Precuenus(L)          | SMN_RolandicOperculum(R)     | 0.04        | -1.58                  | -0.01       |
| SMN_Postcentral(L)        | SMN_Postcentral(R)           | <0.01       | -2.10                  | -0.01       |
| DMN_SuperiorTemporal(R)   | SMN_Precentral(R)            | 0.02        | -1.47                  | -0.01       |
| DMN_MiddleTemporal(R)     | DAN_MiddleTemporal(R)        | 0.02        | -1.91                  | -0.01       |
| DMN_PosteriorCingulate(R) | DAN_MiddleTemporal(R)        | 0.04        | -1.90                  | -0.01       |
| DMN_MiddleTemporal(L)     | DMN_MiddleTemporal(R)        | 0.01        | -1.75                  | -0.01       |
| SN_Striatum(R)            | ECN_Striatum(R)              | 0.03        | -1.80                  | -0.01       |
| SMN_SuperiorTemporal(L)   | DMN_Striatum(R)              | 0.04        | -2.16                  | -0.01       |
| SMN_Postcentral(L)        | SMN_Striatum(L)              | 0.03        | -1.81                  | -0.01       |
| DMN_InferiorTemporal(L)   | ECN_Striatum(L)              | 0.03        | -2.16                  | -0.01       |
| DMN_Precuenus(R)          | ECN_Striatum(L)              | 0.02        | -2.07                  | -0.01       |
| DMN_Striatum(R)           | DMN_Striatum(L)              | 0.01        | -1.70                  | -0.01       |
| VN_Fusiform(L)            | Hippocampus_LA(L)            | 0.04        | -1.35                  | -0.01       |
| SMN_Striatum(L)           | ThalamusL)                   | 0.03        | -2.02                  | -0.01       |
| DMN_MiddleFrontal(L)      | VN_Lingual(L)                | 0.03        | -1.66                  | 0.00        |
| SMN_Insula (L)            | SMN_SuperiorTemporal(L)      | 0.02        | -1.72                  | 0.00        |
| DAN_InferiorParietal(L)   | DAN_PostCentral(L)           | 0.01        | -2.32                  | 0.00        |
| DAN_InferiorTemporal(L)   | VN_Fusiform(R)               | <0.01       | -1.92                  | 0.00        |
| DAN_SuperiorParietal(L)   | VN_Fusiform(R)               | 0.03        | -2.54                  | 0.00        |
| DMN_MiddleFrontal(L)      | VN_Calcarine(R)              | 0.04        | -1.76                  | 0.00        |
| DMN_MiddleFrontal(L)      | VN_Lingual(R)                | 0.02        | -1.69                  | 0.00        |
| SN_MiddleCingulate(R)     | SMN_Postcentral(R)           | <0.01       | -1.71                  | 0.00        |
| ECN_Precuenus(L)          | SMN_Postcentral(R)           | 0.04        | -1.41                  | 0.00        |
| DAN_Superior Frontal (L)  | DAN_SuperiorFrontal(R)       | 0.01        | -2.09                  | 0.00        |
| DAN_SuperiorFrontal(R)    | SN_SupplementaryMotorArea(R) | 0.03        | -1.87                  | 0.00        |
| DMN_MiddleTemporal(L)     | LN_TemporalPole(R)           | 0.01        | -1.59                  | 0.00        |
| VN_Lingual(L)             | ECN_AnteriorCingulate(R)     | 0.01        | -1.93                  | 0.00        |

| Seed                         | Target                       | FDR p value | Regression Coefficient | Effect Size |
|------------------------------|------------------------------|-------------|------------------------|-------------|
| DMN_InferiorOrbitofrontal(L) | DMN_SuperiorMedialFrontal(R) | <0.01       | -1.91                  | 0.00        |
| LN_TemporalPole(R)           | SMN_Striatum(L)              | 0.02        | -1.56                  | 0.00        |
| ECN_MiddleFrontal(R)         | SMN_Striatum(L)              | 0.03        | -1.26                  | 0.00        |
| SN_SupplementaryMotorArea(R) | Hippocampus_RC(R)            | 0.04        | -1.63                  | 0.00        |
| SN_MiddleFrontal(L)          | Thalamus(R)                  | 0.03        | -1.39                  | 0.00        |
| DMN_Precuneus(L)             | DMN_PosteriorCingulate(L)    | <0.01       | -1.97                  | 0.01        |
| DAN_InferiorTemporal(L)      | VN_InferiorOccipital(R)      | <0.01       | -1.60                  | 0.01        |
| DAN_InferiorParietal(L)      | VN_InferiorOccipital(R)      | 0.01        | -1.76                  | 0.01        |
| DMN_PosteriorCingulate(L)    | VN_Lingual(R)                | 0.01        | -1.60                  | 0.01        |
| DAN_SuperiorParietal(L)      | VN_Cuneus(R)                 | 0.04        | -1.23                  | 0.01        |
| SN_SupplementaryMotorArea(L) | DAN_InferiorParietal(R)      | 0.03        | -1.91                  | 0.01        |
| DMN_MiddleFrontal(L)         | DAN_SuperiorParietal(R)      | 0.02        | -1.62                  | 0.01        |
| VN_MiddleTemporal(L)         | SN_SuperiorTemporal(R)       | 0.04        | -1.84                  | 0.01        |
| DMN_InferiorFrontal(L)       | ECN_MiddleFrontal(R)         | <0.01       | -1.86                  | 0.01        |
| DMN_SuperiorMedialFrontal(R) | DMN_InferiorTemporal(R)      | 0.01        | -1.56                  | 0.01        |
| ECN_MiddleFrontal(R)         | DMN_InferiorFrontal(R)       | <0.01       | -1.74                  | 0.01        |
| DMN_MiddleFrontal(L)         | SMN_Striatum(R)              | 0.01        | -2.19                  | 0.01        |
| SMN_Postcentral(R)           | SMN_Striatum(L)              | 0.03        | -1.70                  | 0.01        |
| DMN_MiddleFrontal(L)         | Hippocampus_RC(R)            | 0.03        | -1.76                  | 0.01        |
| VN_Lingual(L)                | Hippocampus_LC(L)            | 0.02        | -1.98                  | 0.01        |
| LN_InferiorTemporal(L)       | Thalamus(L)                  | 0.03        | -1.82                  | 0.01        |
| DMN_MiddleFrontal(L)         | VN_Lingual(L)                | 0.03        | -1.60                  | 0.02        |
| DMN_Angularl(L)              | VN_Calcarine(L)              | 0.03        | -1.00                  | 0.02        |
| DMN_MiddleFrontal(L)         | VN_Calcarine(L)              | <0.01       | -1.61                  | 0.02        |
| DMN_MiddleTemporal(L)        | DMN_MiddleTemporal(L)        | <0.01       | -1.77                  | 0.02        |
| ECN_InferiorFrontal(R)       | VN_Calcarine(R)              | 0.04        | -1.85                  | 0.02        |
| SN_Supramarginal (L)         | VN_MiddleOccipital(R)        | 0.04        | -1.79                  | 0.02        |



| Seed                         | Target                        | FDR p value | Regression Coefficient | Effect Size |
|------------------------------|-------------------------------|-------------|------------------------|-------------|
| SMN_Insula (L)               | SMN_Insula(R)                 | <0.01       | -2.05                  | 0.02        |
| SMN_Postcentral(L)           | SMN_RolandicOperculum(R)      | <0.01       | -1.94                  | 0.02        |
| DMN_MiddleTemporal(L)        | DAN_MiddleTemporal(R)         | <0.01       | -1.59                  | 0.02        |
| DAN_SuperiorFrontal(R)       | DAN_Postcentral(R)            | 0.02        | -1.22                  | 0.02        |
| SMN_Paracentral(L)           | DAN_SuperiorParietal(R)       | 0.03        | -1.97                  | 0.02        |
| LN_InferiorTemporal(L)       | ECN_InferiorFrontal(R)        | 0.01        | -2.29                  | 0.02        |
| Hippocampus_LA(L)            | ECN_MiddleFrontal(R)          | 0.05        | -1.83                  | 0.02        |
| VN_Calcarine(L)              | DMN_Angular(R)                | 0.03        | -0.98                  | 0.02        |
| DMN_InferiorOrbitofrontal(L) | DMN_Angular(R)                | 0.04        | -1.79                  | 0.02        |
| DMN_Angular(R)               | DMN_MiddleTemporal(R)         | 0.02        | -2.03                  | 0.02        |
| DMN_InferiorOrbitofrontal(L) | DMN_OrbitalInferiorFrontal(R) | 0.01        | -1.77                  | 0.02        |
| DMN_Angular(R)               | DMN_InferiorFrontal(R)        | <0.01       | -1.62                  | 0.02        |
| DMN_Precuneus(L)             | DMN_PosteriorCingulate(R)     | <0.01       | -2.47                  | 0.02        |
| DMN_MiddleTemporal(R)        | SMN_Striatum(L)               | 0.03        | -1.69                  | 0.02        |
| LN_Striatum(L)               | DMN_Striatum(L)               | 0.01        | -1.57                  | 0.02        |
| ECN_Supramarginal(R)         | Hippocampus_RA(R)             | 0.03        | -1.51                  | 0.02        |
| SN_AnteriorInsula (L)        | Thalamus(L)                   | 0.01        | -2.01                  | 0.02        |
| DMN_InferiorOrbitofrontal(L) | LN_InferiorTemporal(L)        | <0.01       | -1.63                  | 0.03        |
| DAN_SuperiorParietal(L)      | VN_Calcarine(R)               | 0.04        | -1.59                  | 0.03        |
| SN_SupplementaryMotorArea(L) | DAN_SuperiorFrontal(R)        | 0.05        | -1.58                  | 0.03        |
| Hippocampus_LA(L)            | SN_Insula(R)                  | 0.01        | -1.95                  | 0.03        |
| DAN_InferiorParietal(L)      | LN_TemporalPole(R)            | 0.03        | -1.94                  | 0.03        |
| DMN_InferiorFrontal(L)       | ECN_Angular(R)                | 0.03        | -1.78                  | 0.03        |
| SN_Insula(R)                 | Hippocampus_LA(L)             | 0.01        | -1.95                  | 0.03        |
| VN_MiddleOccipital(L)        | Hippocampus_LC(L)             | <0.01       | -1.67                  | 0.03        |
| DAN_InferiorFrontal(R)       | Thalamus(R)                   | <0.010      | -1.89                  | 0.03        |
| DAN_Striatum(R)              | Thalamus(R)                   | 0.01        | -1.55                  | 0.03        |

| Seed                         | Target                       | FDR p value | Regression Coefficient | Effect Size |
|------------------------------|------------------------------|-------------|------------------------|-------------|
| DMN_SuperiorMedialFrontal(L) | VN_Lingual(R)                | 0.01        | -1.67                  | 0.04        |
| SMN_SuperiorTemporal(L)      | SMN_Postcentral(R)           | 0.01        | -1.82                  | 0.04        |
| SMN_RolandicOperculum(R)     | SMN_Postcentral(R)           | <0.01       | -1.73                  | 0.04        |
| DAN_InferiorTemporal(L)      | ECN_MiddleFrontal(R)         | 0.04        | -1.72                  | 0.04        |
| LN_InferiorTemporal(L)       | DMN_InferiorFrontal(R)       | 0.04        | -1.67                  | 0.04        |
| VN_Lingual(R)                | DMN_SuperiorMedialFrontal(R) | 0.05        | -1.83                  | 0.04        |
| VN_Lingual(L)                | DMN_MiddleFrontal(R)         | 0.02        | -2.04                  | 0.04        |
| DMN_MiddleFrontal(L)         | SMN_Striatum(R)              | 0.01        | -1.48                  | 0.04        |
| DMN_InferiorTemporal(R)      | Hippocampus_RA(R)            | 0.05        | -1.82                  | 0.04        |
| DMN_Angularl(L)              | Hippocampus_RC(R)            | 0.02        | -1.70                  | 0.04        |
| DAN_InferiorFrontal(R)       | Thalamus(L)                  | 0.04        | -2.13                  | 0.04        |
| DMN_InferiorTemporal(L)      | DMN_MiddleTemporal(L)        | <0.01       | -1.44                  | 0.05        |
| ECN_MiddleCingulate(L)       | DMN_MedialOrbitofrontal(L)   | 0.01        | -1.77                  | 0.05        |
| SMN_Insula (L)               | SMN_RolandicOperculum(R)     | <0.01       | -1.81                  | 0.05        |
| DMN_AnteriorCingulate(R)     | SN_MiddleCingulate(R)        | 0.04        | -2.60                  | 0.05        |
| ECN_Precuenus(L)             | ECN_MiddleCingulate(R)       | 0.03        | -2.16                  | 0.05        |
| DMN_MedialOrbitofrontal(L)   | ECN_Precuneus(R)             | 0.01        | -2.06                  | 0.05        |
| VN_Lingual(L)                | DMN_AnteriorCingulate(R)     | <0.01       | -2.23                  | 0.05        |
| VN_Calcarine(L)              | DMN_AnteriorCingulate(R)     | 0.02        | -1.67                  | 0.05        |
| SMN_SuperiorTemporal(R)      | DMN_Striatum(L)              | 0.02        | -2.04                  | 0.05        |
| SN_MiddleFrontal(L)          | DMN_Striatum(L)              | 0.03        | -1.66                  | 0.05        |
| SN_SupplementaryMotorArea(R) | Thalamus(R)                  | 0.04        | -1.81                  | 0.05        |
| DMN_MedialOrbitofrontal(L)   | VN_Calcarine(L)              | 0.01        | -1.72                  | 0.06        |
| ECN_MiddleCingulate(L)       | ECN_Precuenus(L)             | 0.01        | -2.19                  | 0.06        |
| DMN_MiddleFrontal(R)         | VN_Calcarine(R)              | <0.01       | -1.62                  | 0.06        |
| DMN_MiddleFrontal(R)         | VN_Lingual(R)                | 0.01        | -1.71                  | 0.06        |
| VN_SuperiorOccipital(L)      | VN_MiddleOccipital(R)        | 0.03        | -2.15                  | 0.06        |

| Seed                         | Target                       | FDR p value | Regression Coefficient | Effect Size |
|------------------------------|------------------------------|-------------|------------------------|-------------|
| SMN_SuperiorTemporal(L)      | SMN_RolandicOperculum(R)     | <0.01       | -1.65                  | 0.06        |
| DMN_InferiorOrbitofrontal(L) | DAN_InferiorParietal(R)      | 0.01        | -2.08                  | 0.06        |
| DMN_MiddleFrontal(L)         | DAN_SuperiorParietal(R)      | 0.01        | -1.85                  | 0.06        |
| DAN_MiddleTemporal(R)        | SN_SuperiorTemporal(R)       | 0.01        | -1.76                  | 0.06        |
| DAN_SuperiorParietal(L)      | ECN_InferiorFrontal(R)       | 0.02        | -1.75                  | 0.06        |
| ECN_MiddleCingulate(L)       | ECN_MiddleCingulate(R)       | 0.03        | -1.90                  | 0.06        |
| VN_Calcarine(L)              | DMN_MiddleFrontal(R)         | <0.01       | -1.59                  | 0.06        |
| VN_Fusiform(L)               | Hippocampus_RA(R)            | 0.01        | -1.81                  | 0.06        |
| VN_Fusiform(R)               | Hippocampus_RC(R)            | 0.03        | -2.04                  | 0.06        |
| DMN_MedialOrbitofrontal(L)   | VN_Lingual(L)                | <0.01       | -2.28                  | 0.07        |
| DMN_SuperiorMedialFrontal(L) | VN_Calcarine(L)              | 0.03        | -1.32                  | 0.07        |
| ECN_InferiorFrontal(L)       | DAN_SuperiorParietal(L)      | <0.01       | -1.88                  | 0.07        |
| DMN_SuperiorMedialFrontal(L) | SMN_Postcentral(R)           | 0.03        | -1.69                  | 0.07        |
| SN_AnteriorCingulate(L)      | DAN_SuperiorParietal(R)      | 0.02        | -1.89                  | 0.07        |
| ECN_InferiorFrontal(L)       | DAN_SuperiorParietal(R)      | 0.01        | -1.99                  | 0.07        |
| ECN_InferiorFrontal(L)       | ECN_InferiorFrontal(R)       | <0.01       | -1.45                  | 0.07        |
| DMN_InferiorOrbitofrontal(L) | ECN_MiddleFrontal(R)         | <0.01       | -2.36                  | 0.07        |
| DMN_Precuneus(L)             | ECN_Precuneus(R)             | 0.03        | -2.65                  | 0.07        |
| VN_Calcarine(L)              | DMN_SuperiorMedialFrontal(R) | 0.04        | -1.54                  | 0.07        |
| SN_Striatum(R)               | DAN_Striatum(L)              | 0.05        | -1.03                  | 0.07        |
| DAN_Striatum(L)              | SN_Striatum(L)               | 0.05        | -1.03                  | 0.07        |
| DMN_Striatum(R)              | LN_Striatum(L)               | <0.01       | -1.45                  | 0.07        |
| VN_MiddleTemporal(L)         | Hippocampus_RA(R)            | 0.03        | -2.23                  | 0.07        |
| DMN_SuperiorMedialFrontal(L) | VN_Lingual(L)                | 0.04        | -1.81                  | 0.08        |
| ECN_MiddleFrontal(R)         | DAN_Striatum(R)              | 0.04        | -1.81                  | 0.08        |
| ECN_MiddleFrontal(R)         | ECN_Striatum(R)              | 0.02        | -1.71                  | 0.08        |
| LN_InferiorTemporal(L)       | SN_Striatum(L)               | 0.03        | -1.99                  | 0.08        |

| Seed                         | Target               | FDR p value | Regression Coefficient | Effect Size |
|------------------------------|----------------------|-------------|------------------------|-------------|
| LN_InferiorTemporal(L)       | LN_Striatum(L)       | 0.04        | -1.43                  | 0.08        |
| DMN_InferiorFrontal(L)       | LN_Striatum(L)       | 0.02        | -1.05                  | 0.08        |
| SN_MiddleCingulate(L)        | Hippocampus_LA(L)    | <0.01       | -1.53                  | 0.08        |
| ECN_InferiorFrontal(L)       | ECN_MiddleFrontal(R) | 0.01        | -1.88                  | 0.09        |
| VN_Fusiform(R)               | Hippocampus_RA(R)    | <0.01       | -1.32                  | 0.09        |
| VN_InferiorOccipital(R)      | Hippocampus_RA(R)    | 0.02        | -1.93                  | 0.09        |
| Hippocampus_RC(R)            | Hippocampus_LC(L)    | 0.03        | -1.35                  | 0.09        |
| DMN_MedialOrbitofrontal(L)   | VN_Cuneus(L)         | 0.02        | -2.38                  | 0.10        |
| VN_Fusiform(R)               | DAN_Striatum(R)      | 0.05        | -2.03                  | 0.10        |
| SMN_Striatum(R)              | ECN_Striatum(R)      | <0.01       | -2.02                  | 0.10        |
| SN_PosteriorInsula (L)       | Hippocampus_LA(L)    | 0.01        | -1.94                  | 0.10        |
| SMN_Postcentral(L)           | SMN_Striatum(R)      | 0.01        | -1.60                  | 0.11        |
| DMN_SuperiorMedialFrontal(R) | Hippocampus_RC(R)    | <0.01       | -1.59                  | 0.12        |
| ECN_Supramarginal(R)         | SN_Insula(R)         | 0.05        | -1.48                  | 0.13        |
| SN_MiddleFrontal(L)          | ECN_MiddleFrontal(R) | 0.02        | -1.67                  | 0.15        |
| DMN_MiddleFrontal(L)         | Hippocampus_LC(L)    | 0.03        | -1.53                  | 0.25        |
